# Supplementary material for: Adaptation to constant light requires Fic-mediated AMPylation of BiP to protect against reversible photoreceptor degeneration
Source: eLife. 2018 Jul 17;7:e38752. doi: 10.7554/eLife.38752 (PMC6066327; doi:10.7554/eLife.38752)
Supplement: Figure 1—figure supplement 2—source data 1. — Quantification of ERG components (white-). [file elife-38752-fig1-figsupp2-data1.xlsx]

## Sheet: Raw Data ERG Quantifications
ON Transients Raw Values
w1118	w- ; Fic	white RNAi, BIP WT	white RNAi, BIP T366A
0.76	0.442	0.73	0.056
0.634	0.3	0.552	0.138
0.75	0.212	0.616	0.35
0.6775	0.83	0.598	0.054
1.292	0.366	0.538	0.556
0.898	0.496	0.658	0.3714
0.868	0.496	0.748	0.398
1.098	0.27	0.502	0.466
0.708	0.256	0.4958	0.368
1.234	0.31	1.02	0.254
0.798	0.332	1.21	0.312
0.796	0.374	1.7	0.096
0.688	0.762	1.6	0.312
1.116	0.8	0.923333	0.292
1.28	0.843333	1.11	0.62
1.16	0.756667	1.31	0.82
1.22	0.896667	0.96	0.366667
1.26	0.873333	1.584	0.266
1.05	1.1	0.972	0.41
0.956667	0.78	0.218	0.23
0.99	0.906667	1.41	0.286
0.874	0.604	0.874	0.232
0.912	0.538	0.912	0.5
1.0325	0.646	1.0325	0.23
OFF Transients Raw Values
w1118	w- ; Fic	white RNAi, BIP WT	white RNAi, BIP T366A
4.682	2.648	9.208	4.196
3.938	2.662	9.13	6.338
5.218	2.404	9.014	3.444
4.034	2.754	6.498	5.256
5.066	4.438	5.678	6.596
6.802	7.6	6.22	6.51
6.672	5.256	7.494	4.374
6.56	5.5516	7.392	1.72
6.434	5.128	5.66	6.508
5.134	5.72	5.57667	7.354
5.186	5.216	9.17333	7.588
4.94	5.66	10.4433	8.282
6.816	6.32	3.55333	7.684
7.014	6.24667	8.76	7.672
5.85	6.80333	7.91667	7.00667
7.083	7.27333	8.91	5.66667
4.48667	6.77	7.16667	7.52667
6.06333	6.42	7.606	3.95667
7.22	6.34	3.41	1.656
7.84	6.77667	5.28	4.906
4.816	4.188	8.436	3.952
3.86	5.128	7.66	3.106
5.716	4.048	3.998	4.718
6.342	5.578	7.992	2.754
SNPs Raw Values
w1118	w- ; Fic	white RNAi, BIP WT	white RNAi, BIP T366A
9.528	11.296	15.01	14.706
8.718	9.294	18.408	15.36
11.86	9.334	17.852	15.44
10.026	6.666	15.21	15.608
11.132	12.036	16.056	14.758
10.792	12.232	13.338	18.91
9.468	14.406	16.65	16.042
10.058	13.994	18.362	14.428
9.182	15.238	12.064	13.3
10.628	15.37	12.0333	13.546
10.0025	15.136	10.2533	15.102
11.2968	8.452	15.4633	14.322
10.722	12.6733	15.89	16.694
11.732	12.97	10.0967	15.81
12.03	14.0733	14.12	10.4467
9.29667	12.22	12.1567	10.1533
9.20667	12.94	13.5433	11.9133
9.3	12.33	12	9.356
11.2733	11.2957	18.682	12.12
12.85	12.01	13.306	14.732
9.684	11.3833	12.73	11.218
12.44	10.978	17.584	13.62
11.424	13.24	11.2	12.696
12.02	12.68	14.86	12.106

## Sheet: 1-way ANOVA ON
Number of families	1
Number of comparisons per family	6
Alpha	0.05
Holm-Sidak's multiple comparisons test	Mean Diff.	Significant?	Summary	Adjusted P Value
w1118 vs. w- ; Fic	0.3693	Yes	****	<0.0001	A-B
w1118 vs. white RNAi, BIP WT	0.03246	No	ns	0.6798	A-C
w1118 vs. white RNAi, BIP T366A	0.6279	Yes	****	<0.0001	A-D
w- ; Fic vs. white RNAi, BIP WT	-0.3368	Yes	***	0.0001	B-C
w- ; Fic vs. white RNAi, BIP T366A	0.2586	Yes	**	0.0028	B-D
white RNAi, BIP WT vs. white RNAi, BIP T366A	0.5954	Yes	****	<0.0001	C-D
Test details	Mean 1	Mean 2	Mean Diff.	SE of diff.	n1	n2	t	DF
w1118 vs. w- ; Fic	0.9605	0.5913	0.3693	0.07839	24	24	4.711	92
w1118 vs. white RNAi, BIP WT	0.9605	0.9281	0.03246	0.07839	24	24	0.4141	92
w1118 vs. white RNAi, BIP T366A	0.9605	0.3327	0.6279	0.07839	24	24	8.01	92
w- ; Fic vs. white RNAi, BIP WT	0.5913	0.9281	-0.3368	0.07839	24	24	4.296	92
w- ; Fic vs. white RNAi, BIP T366A	0.5913	0.3327	0.2586	0.07839	24	24	3.299	92
white RNAi, BIP WT vs. white RNAi, BIP T366A	0.9281	0.3327	0.5954	0.07839	24	24	7.595	92

## Sheet: 1-way ANOVA OFF
Number of families	1
Number of comparisons per family	6
Alpha	0.05
Holm-Sidak's multiple comparisons test	Mean Diff.	Significant?	Summary	Adjusted P Value
w1118 vs. w- ; Fic ; TM6b/Sb	0.4101	No	ns	0.7614	A-B
w1118 vs. white RNAi, BIP wild type	-1.478	Yes	**	0.0079	A-C
w1118 vs. white RNAi, BIP T366A	0.3545	No	ns	0.7614	A-D
w- ; Fic ; TM6b/Sb vs. white RNAi, BIP wild type	-1.888	Yes	***	0.0006	B-C
w- ; Fic ; TM6b/Sb vs. white RNAi, BIP T366A	-0.05564	No	ns	0.905	B-D
white RNAi, BIP wild type vs. white RNAi, BIP T366A	1.833	Yes	***	0.0008	C-D
Test details	Mean 1	Mean 2	Mean Diff.	SE of diff.	n1	n2	t	DF
w1118 vs. w- ; Fic ; TM6b/Sb	5.696	5.286	0.4101	0.4648	24	24	0.8825	96
w1118 vs. white RNAi, BIP wild type	5.696	7.174	-1.478	0.4648	24	24	3.181	96
w1118 vs. white RNAi, BIP T366A	5.696	5.342	0.3545	0.4648	24	24	0.7627	96
w- ; Fic ; TM6b/Sb vs. white RNAi, BIP wild type	5.286	7.174	-1.888	0.4648	24	24	4.063	96
w- ; Fic ; TM6b/Sb vs. white RNAi, BIP T366A	5.286	5.342	-0.05564	0.4648	24	24	0.1197	96
white RNAi, BIP wild type vs. white RNAi, BIP T366A	7.174	5.342	1.833	0.4648	24	24	3.943	96

## Sheet: 1-way ANOVA SNP
Number of families	1
Number of comparisons per family	6
Alpha	0.05
Holm-Sidak's multiple comparisons test	Mean Diff.	Significant?	Summary	Adjusted P Value
w1118 vs. w- ; Fic ; TM6b/Sb	-1.589	Yes	*	0.0199	A-B
w1118 vs. white RNAi, BIP wild type	-3.878	Yes	****	<0.0001	A-C
w1118 vs. white RNAi, BIP T366A	-3.226	Yes	****	<0.0001	A-D
w- ; Fic ; TM6b/Sb vs. white RNAi, BIP wild type	-2.289	Yes	***	0.0008	B-C
w- ; Fic ; TM6b/Sb vs. white RNAi, BIP T366A	-1.637	Yes	*	0.0199	B-D
white RNAi, BIP wild type vs. white RNAi, BIP T366A	0.6517	No	ns	0.2723	C-D
Test details	Mean 1	Mean 2	Mean Diff.	SE of diff.	n1	n2	t	DF
w1118 vs. w- ; Fic ; TM6b/Sb	10.62	12.2	-1.589	0.5903	24	24	2.692	96
w1118 vs. white RNAi, BIP wild type	10.62	14.49	-3.878	0.5903	24	24	6.57	96
w1118 vs. white RNAi, BIP T366A	10.62	13.84	-3.226	0.5903	24	24	5.465	96
w- ; Fic ; TM6b/Sb vs. white RNAi, BIP wild type	12.2	14.49	-2.289	0.5903	24	24	3.877	96
w- ; Fic ; TM6b/Sb vs. white RNAi, BIP T366A	12.2	13.84	-1.637	0.5903	24	24	2.773	96
white RNAi, BIP wild type vs. white RNAi, BIP T366A	14.49	13.84	0.6517	0.5903	24	24	1.104	96
