# Supplementary material for: Adaptation to constant light requires Fic-mediated AMPylation of BiP to protect against reversible photoreceptor degeneration
Source: eLife. 2018 Jul 17;7:e38752. doi: 10.7554/eLife.38752 (PMC6066327; doi:10.7554/eLife.38752)
Supplement: Figure 1—figure supplement 3—source data 2. — Quantification of ERG components (white+). [file elife-38752-fig1-figsupp3-data2.xlsx]

## Sheet: Raw Data ERG Quantifications
ON Transients Raw Values
OreR	Fic30C	BiP WT	BiP T366A
0.892	1.316	1.252	0.664
0.732422	0.984	1.328	0.962
0.726	0.76	1.722	1.324
1.776	1.408	0.752	0.974
0.848	0.986	0.778	1.04
1.0437	1.434	0.996	0.832
1.14136	1.794	0.634	0.766
1.15356	1.234	1.06	0.95
0.518	1.244	0.84	0.266
0.898	0.938	0	0.454
1.112	1.732	1.584	0.41
0.84	1.202	0.094	0
1.3	1.354	0.972	0.23
0.518	1.118	0.218	0.286
0.898	0.86	1.41	0.262
1.112	1.732	0.22	0
0.84	1.202	0.182	0.224
1.3	1.354	0.292	0.288
OFF Transients Raw Values
OreR	Fic30C	BiP WT	BiP T366A
5.566	7.092	6.518	5.418
7.456	6.172	6.458	6.596
6.972	7.776	7.33	5.95
5.512	6.748	4.972	6.734
8.102	7.392	8.016	6.16
6.54	9.072	6.108	7.148
8.954	8.662	7.86	6.306
6.592	6.616	6.464	7.47
7.52	7.84	8.234	0.25
4.568	8.53	7.606	1.656
5.286	7.634	3.41	2.768
5.634	4.562	5.28	4.906
6.126	7.836	8.436	3.952
4.568	5.636	7.66	3.106
5.286	4.736	3.998	4.242
5.634	7.634	7.992	4.718
3.498	4.562	8.21	2.754
6.126	7.836	7.186	4.774
SNPs Raw Values
OreR	Fic30C	BiP WT	BiP T366A
11.006	8.504	10.3	11.4
6.51245	6.456	11.74	8.712
10.778	8.646	12.526	8.454
9.52	9.076	11.222	10.112
6.55518	7.826	11.166	12.39
5.82275	9.542	10.376	11.506
5.20019	8.874	11.038	8.972
6.58569	6.116	10.528	13.066
5.216	7.934	13.612	9.356
5.122	9.834	18.682	11.46
6.26	6.04	13.306	12.12
2.88	2.78	8.328	14.732
8.496	7.12	12.73	11.218
5.216	4.038	17.584	13.36
5.122	3.94	11.2	13.62
6.26	6.04	14.86	12.696
2.88	2.78	17.216	12.106
8.496	7.12	15.46	13.648

## Sheet: 1-way ANOVA ON
Number of families	1
Number of comparisons per family	6
Alpha	0.05
Holm-Sidak's multiple comparisons test	Mean Diff.	Significant?	Summary	Adjusted P Value
OreR vs. Fic30C	-0.2779	No	ns	0.1116	A-B
OreR vs. BiP WT	0.1842	No	ns	0.1669	A-C
OreR vs. BiP T366A	0.4287	Yes	**	0.0071	A-D
Fic30C vs. BiP WT	0.4621	Yes	**	0.004	B-C
Fic30C vs. BiP T366A	0.7067	Yes	****	<0.0001	B-D
BiP WT vs. BiP T366A	0.2446	No	ns	0.1312	C-D
Test details	Mean 1	Mean 2	Mean Diff.	SE of diff.	n1	n2	t	DF
OreR vs. Fic30C	0.9805	1.258	-0.2779	0.1318	18	18	2.109	68
OreR vs. BiP WT	0.9805	0.7963	0.1842	0.1318	18	18	1.397	68
OreR vs. BiP T366A	0.9805	0.5518	0.4287	0.1318	18	18	3.252	68
Fic30C vs. BiP WT	1.258	0.7963	0.4621	0.1318	18	18	3.506	68
Fic30C vs. BiP T366A	1.258	0.5518	0.7067	0.1318	18	18	5.361	68
BiP WT vs. BiP T366A	0.7963	0.5518	0.2446	0.1318	18	18	1.855	68

## Sheet: 1-way ANOVA OFF
Number of families	1
Number of comparisons per family	6
Alpha	0.05
Holm-Sidak's multiple comparisons test	Mean Diff.	Significant?	Summary	Adjusted P Value
OreR vs. Fic ; TM6b/Sb	-0.9109	No	ns	0.2434	A-B
OreR vs. BiP WT	-0.6554	No	ns	0.3891	A-C
OreR vs. BiP T366A	1.391	Yes	*	0.0409	A-D
Fic ; TM6b/Sb vs. BiP WT	0.2554	No	ns	0.6298	B-C
Fic ; TM6b/Sb vs. BiP T366A	2.302	Yes	***	0.0003	B-D
BiP WT vs. BiP T366A	2.046	Yes	**	0.0012	C-D
Test details	Mean 1	Mean 2	Mean Diff.	SE of diff.	n1	n2	t	DF
OreR vs. Fic ; TM6b/Sb	6.108	7.019	-0.9109	0.5276	18	18	1.727	68
OreR vs. BiP WT	6.108	6.763	-0.6554	0.5276	18	18	1.242	68
OreR vs. BiP T366A	6.108	4.717	1.391	0.5276	18	18	2.636	68
Fic ; TM6b/Sb vs. BiP WT	7.019	6.763	0.2554	0.5276	18	18	0.4842	68
Fic ; TM6b/Sb vs. BiP T366A	7.019	4.717	2.302	0.5276	18	18	4.363	68
BiP WT vs. BiP T366A	6.763	4.717	2.046	0.5276	18	18	3.878	68

## Sheet: 1-way ANOVA SNP
Number of families	1
Number of comparisons per family	6
Alpha	0.05
Holm-Sidak's multiple comparisons test	Mean Diff.	Significant?	Summary	Adjusted P Value
OreR vs. Fic ; TM6b/Sb	-0.2632	No	ns	0.737	A-B
OreR vs. BiP WT	-6.33	Yes	****	<0.0001	A-C
OreR vs. BiP T366A	-5.056	Yes	****	<0.0001	A-D
Fic ; TM6b/Sb vs. BiP WT	-6.067	Yes	****	<0.0001	B-C
Fic ; TM6b/Sb vs. BiP T366A	-4.792	Yes	****	<0.0001	B-D
BiP WT vs. BiP T366A	1.275	No	ns	0.2026	C-D
Test details	Mean 1	Mean 2	Mean Diff.	SE of diff.	n1	n2	t	DF
OreR vs. Fic ; TM6b/Sb	6.552	6.815	-0.2632	0.7805	18	18	0.3372	68
OreR vs. BiP WT	6.552	12.88	-6.33	0.7805	18	18	8.11	68
OreR vs. BiP T366A	6.552	11.61	-5.056	0.7805	18	18	6.477	68
Fic ; TM6b/Sb vs. BiP WT	6.815	12.88	-6.067	0.7805	18	18	7.773	68
Fic ; TM6b/Sb vs. BiP T366A	6.815	11.61	-4.792	0.7805	18	18	6.14	68
BiP WT vs. BiP T366A	12.88	11.61	1.275	0.7805	18	18	1.633	68
