# Supplementary material for: Adaptation to constant light requires Fic-mediated AMPylation of BiP to protect against reversible photoreceptor degeneration
Source: eLife. 2018 Jul 17;7:e38752. doi: 10.7554/eLife.38752 (PMC6066327; doi:10.7554/eLife.38752)
Supplement: Figure 1—source data 1. — Quantification of fly survival. [file elife-38752-fig1-data1.xlsx]

## Sheet: Figure 1B. Percent of Progeny 
Percent of Observed Progeny with indicated genotype, relative to Expected
Trial	BiP	BiP ;; BiPWT	BiP ;; BiPT366A	BiP ;; BiPT518A
1	0	1.27235	0.97971	0.13544
2	0	1.01419	1.46225	0.11761
3	0	1.12554	1.30194	0.14429

## Sheet: Figure 1C. Percent of Progeny
Percent of Observed Progeny with indicated genotype, relative to Expected
Trial	WT ;Da.Gal4, UAS-FicE247G	fic ;Da.Gal4, UAS-FicE247G	fic ;Da.Gal4, UAS-FicE247G / BiPWT	fic ;Da.Gal4, UAS-FicE247G / BiPT366A	fic ;Da.Gal4, UAS-FicE247G / BiPT518A	BiP ; fic ;Da.Gal4, UAS-FicE247G / BiPT366A
1	1.06623	0	0	0.121827	0	0.764706
2	1.12644	0	0	0.22069	0	0.633663
3	1.09846	0	0	0.301887	0	0.615385
