# Supplementary material for: Adaptation to constant light requires Fic-mediated AMPylation of BiP to protect against reversible photoreceptor degeneration
Source: eLife. 2018 Jul 17;7:e38752. doi: 10.7554/eLife.38752 (PMC6066327; doi:10.7554/eLife.38752)
Supplement: Figure 3—figure supplement 2—source data 2. — Quantification of ERG components with 500 and 5000 lux. [file elife-38752-fig3-figsupp2-data2.xlsx]

## Sheet: Raw Data for S3.3 B
ON Transients Raw Values
w1118 500 lux L:D	w- Fic30c 500 lux L:D	w1118 500 lux L:L	w- Fic30c 500 lux L:L	w1118 5000 lux L:D	w- Fic30c 5000 lux L:D	w1118 5000 lux L:L	w- Fic30c 5000 lux L:L
0.95	1.82	0.816667	0.64	0.79	0.56	0.62	0
1.64	1.06667	0.07	0	0.866667	0.99	1.14333	0
1.1	1.15	0	0	1.13	0.926667	0.683333	0
2.00333	0.883333	0.286667	0	1.03	0.813333	0.683333	0
1.62	1.9	0.976667	0.09	1.29333	1.15	0.72	0
2.16	1.1	0.47	0	0.74	1.24	0.63	0.0633333
1.09333	1.14333	0.0666667	0	0.746667	1.19	0.69	0
1.18	0.843333	0.166667	0.296667	0.91	1.12	0.43	0
1.1	0.803333	0.236667	0	0.876667	1.24	0.67	0
1.24	1.26667	0.57	0			0.17	0.09
OFF Transients Raw Values
w1118 500 lux L:D	w- Fic30c 500 lux L:D	w1118 500 lux L:L	w- Fic30c 500 lux L:L	w1118 5000 lux L:D	w- Fic30c 5000 lux L:D	w1118 5000 lux L:L	w- Fic30c 5000 lux L:L
5.22	7.05	6.19667	0.223333	4.25	4.17667	4.27333	0
5.8	9.15667	2.93333	0	6.78	4.44333	4.37667	0
5.63667	6.35	0	0.233333	6.34	5.94	5.07667	0
7.78333	6.30667	2.58333	0	7.29667	4.44667	0.843333	0
7.06333	6.46333	4.64	0	6.82	6	4.89	0
6.72333	5.11333	4.29	0	5.10667	6.35	5.03333	0.166667
6.01	7.06667	5.4	0	6.12333	6.35	5.67	0.233333
5.94333	5.52	3.79333	0	5.88	6.23	4.95333	0
6.57	7.14667	5.31	0	6.83	6.52	3.59333	0
6.51	7.36333	5.12	0			5.04667	0.0766667
SNPs Raw Values
w1118 500 lux L:D	w- Fic30c 500 lux L:D	w1118 500 lux L:L	w- Fic30c 500 lux L:L	w1118 5000 lux L:D	w- Fic30c 5000 lux L:D	w1118 5000 lux L:L	w- Fic30c 5000 lux L:L
10.57	16.7333	11.9867	6.6	9.42333	11.8733	9.60667	4.26
10.4933	16.2767	9.34	6.52667	12.58	11.2433	11.7367	3.37
7.55	14.2633	3.38	4.14	11.79	13.5833	13.1633	3.27333
13.1333	14.42	6.96667	6.91333	13.8233	11.3167	8.92333	4.23
11.9333	15.1733	11.5533	5.01667	13.6667	14	12.1467	3.02
10.69	8.26667	11.4767	6.75	11.6433	14.94	13.09	4.34667
9.84	17.45	12.2967	5.46	11.2733	15.0867	13.88	3.46
12.2467	16.3233	14.4167	7.33667	15.5867	16.5733	13.9033	3.7
13.46	15.6233	10.6633	4.6	14.15	14.7933	9.39333	3.8
11.13	15.2	13.2233	4.19			11.0067	3.80667

## Sheet: 1-Way ANOVA ON
Number of families	1
Number of comparisons per family	28
Alpha	0.05
Tukey's multiple comparisons test	Mean Diff.	95.00% CI of diff.	Significant?	Summary	Adjusted P Value
w1118 500 lux L:D vs. w- Fic30c 500 lux L:D	0.211	-0.1819 to 0.6039	No	ns	0.7011	A-B
w1118 500 lux L:D vs. w1118 500 lux L:L	1.043	0.6498 to 1.436	Yes	****	<0.0001	A-C
w1118 500 lux L:D vs. w- Fic30c 500 lux L:L	1.306	0.9131 to 1.699	Yes	****	<0.0001	A-D
w1118 500 lux L:D vs. w1118 5000 lux L:D	0.4772	0.07354 to 0.8808	Yes	**	0.0098	A-E
w1118 500 lux L:D vs. w- Fic30c 5000 lux L:D	0.3831	-0.02053 to 0.7868	No	ns	0.0751	A-F
w1118 500 lux L:D vs. w1118 5000 lux L:L	0.7647	0.3718 to 1.158	Yes	****	<0.0001	A-G
w1118 500 lux L:D vs. w- Fic30c 5000 lux L:L	1.393	1 to 1.786	Yes	****	<0.0001	A-H
w- Fic30c 500 lux L:D vs. w1118 500 lux L:L	0.8317	0.4388 to 1.225	Yes	****	<0.0001	B-C
w- Fic30c 500 lux L:D vs. w- Fic30c 500 lux L:L	1.095	0.7021 to 1.488	Yes	****	<0.0001	B-D
w- Fic30c 500 lux L:D vs. w1118 5000 lux L:D	0.2662	-0.1375 to 0.6698	No	ns	0.4502	B-E
w- Fic30c 500 lux L:D vs. w- Fic30c 5000 lux L:D	0.1721	-0.2315 to 0.5758	No	ns	0.8833	B-F
w- Fic30c 500 lux L:D vs. w1118 5000 lux L:L	0.5537	0.1608 to 0.9465	Yes	***	0.0009	B-G
w- Fic30c 500 lux L:D vs. w- Fic30c 5000 lux L:L	1.182	0.7895 to 1.575	Yes	****	<0.0001	B-H
w1118 500 lux L:L vs. w- Fic30c 500 lux L:L	0.2633	-0.1295 to 0.6562	No	ns	0.4288	C-D
w1118 500 lux L:L vs. w1118 5000 lux L:D	-0.5655	-0.9691 to -0.1618	Yes	**	0.001	C-E
w1118 500 lux L:L vs. w- Fic30c 5000 lux L:D	-0.6596	-1.063 to -0.2559	Yes	****	<0.0001	C-F
w1118 500 lux L:L vs. w1118 5000 lux L:L	-0.278	-0.6709 to 0.1149	No	ns	0.3581	C-G
w1118 500 lux L:L vs. w- Fic30c 5000 lux L:L	0.3507	-0.04221 to 0.7435	No	ns	0.1145	C-H
w- Fic30c 500 lux L:L vs. w1118 5000 lux L:D	-0.8288	-1.232 to -0.4252	Yes	****	<0.0001	D-E
w- Fic30c 500 lux L:L vs. w- Fic30c 5000 lux L:D	-0.9229	-1.327 to -0.5192	Yes	****	<0.0001	D-F
w- Fic30c 500 lux L:L vs. w1118 5000 lux L:L	-0.5413	-0.9342 to -0.1485	Yes	**	0.0013	D-G
w- Fic30c 500 lux L:L vs. w- Fic30c 5000 lux L:L	0.08733	-0.3055 to 0.4802	No	ns	0.9969	D-H
w1118 5000 lux L:D vs. w- Fic30c 5000 lux L:D	-0.09407	-0.5082 to 0.3201	No	ns	0.9964	E-F
w1118 5000 lux L:D vs. w1118 5000 lux L:L	0.2875	-0.1162 to 0.6911	No	ns	0.3498	E-G
w1118 5000 lux L:D vs. w- Fic30c 5000 lux L:L	0.9161	0.5125 to 1.32	Yes	****	<0.0001	E-H
w- Fic30c 5000 lux L:D vs. w1118 5000 lux L:L	0.3816	-0.02209 to 0.7852	No	ns	0.0773	F-G
w- Fic30c 5000 lux L:D vs. w- Fic30c 5000 lux L:L	1.01	0.6066 to 1.414	Yes	****	<0.0001	F-H
w1118 5000 lux L:L vs. w- Fic30c 5000 lux L:L	0.6287	0.2358 to 1.022	Yes	***	0.0001	G-H
Test details	Mean 1	Mean 2	Mean Diff.	SE of diff.	n1	n2	q	DF
w1118 500 lux L:D vs. w- Fic30c 500 lux L:D	1.409	1.198	0.211	0.1257	10	10	2.373	70
w1118 500 lux L:D vs. w1118 500 lux L:L	1.409	0.366	1.043	0.1257	10	10	11.73	70
w1118 500 lux L:D vs. w- Fic30c 500 lux L:L	1.409	0.1027	1.306	0.1257	10	10	14.69	70
w1118 500 lux L:D vs. w1118 5000 lux L:D	1.409	0.9315	0.4772	0.1292	10	9	5.224	70
w1118 500 lux L:D vs. w- Fic30c 5000 lux L:D	1.409	1.026	0.3831	0.1292	10	9	4.194	70
w1118 500 lux L:D vs. w1118 5000 lux L:L	1.409	0.644	0.7647	0.1257	10	10	8.6	70
w1118 500 lux L:D vs. w- Fic30c 5000 lux L:L	1.409	0.01533	1.393	0.1257	10	10	15.67	70
w- Fic30c 500 lux L:D vs. w1118 500 lux L:L	1.198	0.366	0.8317	0.1257	10	10	9.354	70
w- Fic30c 500 lux L:D vs. w- Fic30c 500 lux L:L	1.198	0.1027	1.095	0.1257	10	10	12.32	70
w- Fic30c 500 lux L:D vs. w1118 5000 lux L:D	1.198	0.9315	0.2662	0.1292	10	9	2.914	70
w- Fic30c 500 lux L:D vs. w- Fic30c 5000 lux L:D	1.198	1.026	0.1721	0.1292	10	9	1.884	70
w- Fic30c 500 lux L:D vs. w1118 5000 lux L:L	1.198	0.644	0.5537	0.1257	10	10	6.227	70
w- Fic30c 500 lux L:D vs. w- Fic30c 5000 lux L:L	1.198	0.01533	1.182	0.1257	10	10	13.3	70
w1118 500 lux L:L vs. w- Fic30c 500 lux L:L	0.366	0.1027	0.2633	0.1257	10	10	2.962	70
w1118 500 lux L:L vs. w1118 5000 lux L:D	0.366	0.9315	-0.5655	0.1292	10	9	6.19	70
w1118 500 lux L:L vs. w- Fic30c 5000 lux L:D	0.366	1.026	-0.6596	0.1292	10	9	7.22	70
w1118 500 lux L:L vs. w1118 5000 lux L:L	0.366	0.644	-0.278	0.1257	10	10	3.127	70
w1118 500 lux L:L vs. w- Fic30c 5000 lux L:L	0.366	0.01533	0.3507	0.1257	10	10	3.944	70
w- Fic30c 500 lux L:L vs. w1118 5000 lux L:D	0.1027	0.9315	-0.8288	0.1292	10	9	9.073	70
w- Fic30c 500 lux L:L vs. w- Fic30c 5000 lux L:D	0.1027	1.026	-0.9229	0.1292	10	9	10.1	70
w- Fic30c 500 lux L:L vs. w1118 5000 lux L:L	0.1027	0.644	-0.5413	0.1257	10	10	6.088	70
w- Fic30c 500 lux L:L vs. w- Fic30c 5000 lux L:L	0.1027	0.01533	0.08733	0.1257	10	10	0.9822	70
w1118 5000 lux L:D vs. w- Fic30c 5000 lux L:D	0.9315	1.026	-0.09407	0.1325	9	9	1.004	70
w1118 5000 lux L:D vs. w1118 5000 lux L:L	0.9315	0.644	0.2875	0.1292	9	10	3.147	70
w1118 5000 lux L:D vs. w- Fic30c 5000 lux L:L	0.9315	0.01533	0.9161	0.1292	9	10	10.03	70
w- Fic30c 5000 lux L:D vs. w1118 5000 lux L:L	1.026	0.644	0.3816	0.1292	9	10	4.177	70
w- Fic30c 5000 lux L:D vs. w- Fic30c 5000 lux L:L	1.026	0.01533	1.01	0.1292	9	10	11.06	70
w1118 5000 lux L:L vs. w- Fic30c 5000 lux L:L	0.644	0.01533	0.6287	0.1257	10	10	7.07	70

## Sheet: 1-Way ANOVA OFF
Number of families	1
Number of comparisons per family	28
Alpha	0.05
Tukey's multiple comparisons test	Mean Diff.	95.00% CI of diff.	Significant?	Summary	Adjusted P Value
w1118 500 lux L:D vs. w- Fic30c 500 lux L:D	-0.4277	-1.897 to 1.041	No	ns	0.9842	A-B
w1118 500 lux L:D vs. w1118 500 lux L:L	2.299	0.8302 to 3.768	Yes	***	0.0002	A-C
w1118 500 lux L:D vs. w- Fic30c 500 lux L:L	6.28	4.811 to 7.749	Yes	****	<0.0001	A-D
w1118 500 lux L:D vs. w1118 5000 lux L:D	0.1675	-1.342 to 1.677	No	ns	>0.9999	A-E
w1118 500 lux L:D vs. w- Fic30c 5000 lux L:D	0.7197	-0.7897 to 2.229	No	ns	0.8102	A-F
w1118 500 lux L:D vs. w1118 5000 lux L:L	1.95	0.4812 to 3.419	Yes	**	0.0023	A-G
w1118 500 lux L:D vs. w- Fic30c 5000 lux L:L	6.278	4.809 to 7.747	Yes	****	<0.0001	A-H
w- Fic30c 500 lux L:D vs. w1118 500 lux L:L	2.727	1.258 to 4.196	Yes	****	<0.0001	B-C
w- Fic30c 500 lux L:D vs. w- Fic30c 500 lux L:L	6.708	5.239 to 8.177	Yes	****	<0.0001	B-D
w- Fic30c 500 lux L:D vs. w1118 5000 lux L:D	0.5951	-0.9142 to 2.105	No	ns	0.9195	B-E
w- Fic30c 500 lux L:D vs. w- Fic30c 5000 lux L:D	1.147	-0.362 to 2.657	No	ns	0.2698	B-F
w- Fic30c 500 lux L:D vs. w1118 5000 lux L:L	2.378	0.9089 to 3.847	Yes	****	<0.0001	B-G
w- Fic30c 500 lux L:D vs. w- Fic30c 5000 lux L:L	6.706	5.237 to 8.175	Yes	****	<0.0001	B-H
w1118 500 lux L:L vs. w- Fic30c 500 lux L:L	3.981	2.512 to 5.45	Yes	****	<0.0001	C-D
w1118 500 lux L:L vs. w1118 5000 lux L:D	-2.132	-3.641 to -0.6225	Yes	***	0.0009	C-E
w1118 500 lux L:L vs. w- Fic30c 5000 lux L:D	-1.58	-3.089 to -0.07026	Yes	*	0.0338	C-F
w1118 500 lux L:L vs. w1118 5000 lux L:L	-0.349	-1.818 to 1.12	No	ns	0.9953	C-G
w1118 500 lux L:L vs. w- Fic30c 5000 lux L:L	3.979	2.51 to 5.448	Yes	****	<0.0001	C-H
w- Fic30c 500 lux L:L vs. w1118 5000 lux L:D	-6.113	-7.622 to -4.603	Yes	****	<0.0001	D-E
w- Fic30c 500 lux L:L vs. w- Fic30c 5000 lux L:D	-5.561	-7.07 to -4.051	Yes	****	<0.0001	D-F
w- Fic30c 500 lux L:L vs. w1118 5000 lux L:L	-4.33	-5.799 to -2.861	Yes	****	<0.0001	D-G
w- Fic30c 500 lux L:L vs. w- Fic30c 5000 lux L:L	-0.002	-1.471 to 1.467	No	ns	>0.9999	D-H
w1118 5000 lux L:D vs. w- Fic30c 5000 lux L:D	0.5522	-0.9964 to 2.101	No	ns	0.9516	E-F
w1118 5000 lux L:D vs. w1118 5000 lux L:L	1.783	0.2735 to 3.292	Yes	**	0.0099	E-G
w1118 5000 lux L:D vs. w- Fic30c 5000 lux L:L	6.111	4.601 to 7.62	Yes	****	<0.0001	E-H
w- Fic30c 5000 lux L:D vs. w1118 5000 lux L:L	1.231	-0.2787 to 2.74	No	ns	0.1934	F-G
w- Fic30c 5000 lux L:D vs. w- Fic30c 5000 lux L:L	5.559	4.049 to 7.068	Yes	****	<0.0001	F-H
w1118 5000 lux L:L vs. w- Fic30c 5000 lux L:L	4.328	2.859 to 5.797	Yes	****	<0.0001	G-H
Test details	Mean 1	Mean 2	Mean Diff.	SE of diff.	n1	n2	q	DF
w1118 500 lux L:D vs. w- Fic30c 500 lux L:D	6.326	6.754	-0.4277	0.4702	10	10	1.286	70
w1118 500 lux L:D vs. w1118 500 lux L:L	6.326	4.027	2.299	0.4702	10	10	6.916	70
w1118 500 lux L:D vs. w- Fic30c 500 lux L:L	6.326	0.04567	6.28	0.4702	10	10	18.89	70
w1118 500 lux L:D vs. w1118 5000 lux L:D	6.326	6.159	0.1675	0.4831	10	9	0.4903	70
w1118 500 lux L:D vs. w- Fic30c 5000 lux L:D	6.326	5.606	0.7197	0.4831	10	9	2.107	70
w1118 500 lux L:D vs. w1118 5000 lux L:L	6.326	4.376	1.95	0.4702	10	10	5.866	70
w1118 500 lux L:D vs. w- Fic30c 5000 lux L:L	6.326	0.04767	6.278	0.4702	10	10	18.88	70
w- Fic30c 500 lux L:D vs. w1118 500 lux L:L	6.754	4.027	2.727	0.4702	10	10	8.202	70
w- Fic30c 500 lux L:D vs. w- Fic30c 500 lux L:L	6.754	0.04567	6.708	0.4702	10	10	20.18	70
w- Fic30c 500 lux L:D vs. w1118 5000 lux L:D	6.754	6.159	0.5951	0.4831	10	9	1.742	70
w- Fic30c 500 lux L:D vs. w- Fic30c 5000 lux L:D	6.754	5.606	1.147	0.4831	10	9	3.359	70
w- Fic30c 500 lux L:D vs. w1118 5000 lux L:L	6.754	4.376	2.378	0.4702	10	10	7.152	70
w- Fic30c 500 lux L:D vs. w- Fic30c 5000 lux L:L	6.754	0.04767	6.706	0.4702	10	10	20.17	70
w1118 500 lux L:L vs. w- Fic30c 500 lux L:L	4.027	0.04567	3.981	0.4702	10	10	11.97	70
w1118 500 lux L:L vs. w1118 5000 lux L:D	4.027	6.159	-2.132	0.4831	10	9	6.241	70
w1118 500 lux L:L vs. w- Fic30c 5000 lux L:D	4.027	5.606	-1.58	0.4831	10	9	4.624	70
w1118 500 lux L:L vs. w1118 5000 lux L:L	4.027	4.376	-0.349	0.4702	10	10	1.05	70
w1118 500 lux L:L vs. w- Fic30c 5000 lux L:L	4.027	0.04767	3.979	0.4702	10	10	11.97	70
w- Fic30c 500 lux L:L vs. w1118 5000 lux L:D	0.04567	6.159	-6.113	0.4831	10	9	17.9	70
w- Fic30c 500 lux L:L vs. w- Fic30c 5000 lux L:D	0.04567	5.606	-5.561	0.4831	10	9	16.28	70
w- Fic30c 500 lux L:L vs. w1118 5000 lux L:L	0.04567	4.376	-4.33	0.4702	10	10	13.02	70
w- Fic30c 500 lux L:L vs. w- Fic30c 5000 lux L:L	0.04567	0.04767	-0.002	0.4702	10	10	0.006015	70
w1118 5000 lux L:D vs. w- Fic30c 5000 lux L:D	6.159	5.606	0.5522	0.4956	9	9	1.576	70
w1118 5000 lux L:D vs. w1118 5000 lux L:L	6.159	4.376	1.783	0.4831	9	10	5.219	70
w1118 5000 lux L:D vs. w- Fic30c 5000 lux L:L	6.159	0.04767	6.111	0.4831	9	10	17.89	70
w- Fic30c 5000 lux L:D vs. w1118 5000 lux L:L	5.606	4.376	1.231	0.4831	9	10	3.603	70
w- Fic30c 5000 lux L:D vs. w- Fic30c 5000 lux L:L	5.606	0.04767	5.559	0.4831	9	10	16.27	70
w1118 5000 lux L:L vs. w- Fic30c 5000 lux L:L	4.376	0.04767	4.328	0.4702	10	10	13.02	70

## Sheet: 1-Way ANOVA SNP
Number of families	1
Number of comparisons per family	28
Alpha	0.05
Tukey's multiple comparisons test	Mean Diff.	95.00% CI of diff.	Significant?	Summary	Adjusted P Value
w1118 500 lux L:D vs. w- Fic30c 500 lux L:D	-3.868	-6.677 to -1.06	Yes	**	0.0013	A-B
w1118 500 lux L:D vs. w1118 500 lux L:L	0.5743	-2.234 to 3.383	No	ns	0.9982	A-C
w1118 500 lux L:D vs. w- Fic30c 500 lux L:L	5.351	2.543 to 8.16	Yes	****	<0.0001	A-D
w1118 500 lux L:D vs. w1118 5000 lux L:D	-1.555	-4.44 to 1.33	No	ns	0.6974	A-E
w1118 500 lux L:D vs. w- Fic30c 5000 lux L:D	-2.608	-5.493 to 0.2778	No	ns	0.1056	A-F
w1118 500 lux L:D vs. w1118 5000 lux L:L	-0.5803	-3.389 to 2.228	No	ns	0.998	A-G
w1118 500 lux L:D vs. w- Fic30c 5000 lux L:L	7.378	4.57 to 10.19	Yes	****	<0.0001	A-H
w- Fic30c 500 lux L:D vs. w1118 500 lux L:L	4.443	1.634 to 7.251	Yes	***	0.0001	B-C
w- Fic30c 500 lux L:D vs. w- Fic30c 500 lux L:L	9.22	6.411 to 12.03	Yes	****	<0.0001	B-D
w- Fic30c 500 lux L:D vs. w1118 5000 lux L:D	2.313	-0.572 to 5.199	No	ns	0.2105	B-E
w- Fic30c 500 lux L:D vs. w- Fic30c 5000 lux L:D	1.261	-1.625 to 4.146	No	ns	0.8696	B-F
w- Fic30c 500 lux L:D vs. w1118 5000 lux L:L	3.288	0.4796 to 6.096	Yes	*	0.0109	B-G
w- Fic30c 500 lux L:D vs. w- Fic30c 5000 lux L:L	11.25	8.438 to 14.05	Yes	****	<0.0001	B-H
w1118 500 lux L:L vs. w- Fic30c 500 lux L:L	4.777	1.969 to 7.585	Yes	****	<0.0001	C-D
w1118 500 lux L:L vs. w1118 5000 lux L:D	-2.129	-5.015 to 0.756	No	ns	0.3053	C-E
w1118 500 lux L:L vs. w- Fic30c 5000 lux L:D	-3.182	-6.067 to -0.2966	Yes	*	0.0206	C-F
w1118 500 lux L:L vs. w1118 5000 lux L:L	-1.155	-3.963 to 1.654	No	ns	0.9015	C-G
w1118 500 lux L:L vs. w- Fic30c 5000 lux L:L	6.804	3.995 to 9.612	Yes	****	<0.0001	C-H
w- Fic30c 500 lux L:L vs. w1118 5000 lux L:D	-6.906	-9.792 to -4.021	Yes	****	<0.0001	D-E
w- Fic30c 500 lux L:L vs. w- Fic30c 5000 lux L:D	-7.959	-10.84 to -5.074	Yes	****	<0.0001	D-F
w- Fic30c 500 lux L:L vs. w1118 5000 lux L:L	-5.932	-8.74 to -3.123	Yes	****	<0.0001	D-G
w- Fic30c 500 lux L:L vs. w- Fic30c 5000 lux L:L	2.027	-0.7817 to 4.835	No	ns	0.3331	D-H
w1118 5000 lux L:D vs. w- Fic30c 5000 lux L:D	-1.053	-4.013 to 1.908	No	ns	0.9523	E-F
w1118 5000 lux L:D vs. w1118 5000 lux L:L	0.9746	-1.911 to 3.86	No	ns	0.9637	E-G
w1118 5000 lux L:D vs. w- Fic30c 5000 lux L:L	8.933	6.048 to 11.82	Yes	****	<0.0001	E-H
w- Fic30c 5000 lux L:D vs. w1118 5000 lux L:L	2.027	-0.8581 to 4.913	No	ns	0.3673	F-G
w- Fic30c 5000 lux L:D vs. w- Fic30c 5000 lux L:L	9.986	7.1 to 12.87	Yes	****	<0.0001	F-H
w1118 5000 lux L:L vs. w- Fic30c 5000 lux L:L	7.958	5.15 to 10.77	Yes	****	<0.0001	G-H
Test details	Mean 1	Mean 2	Mean Diff.	SE of diff.	n1	n2	q	DF
w1118 500 lux L:D vs. w- Fic30c 500 lux L:D	11.1	14.97	-3.868	0.8988	10	10	6.086	70
w1118 500 lux L:D vs. w1118 500 lux L:L	11.1	10.53	0.5743	0.8988	10	10	0.9036	70
w1118 500 lux L:D vs. w- Fic30c 500 lux L:L	11.1	5.753	5.351	0.8988	10	10	8.42	70
w1118 500 lux L:D vs. w1118 5000 lux L:D	11.1	12.66	-1.555	0.9235	10	9	2.381	70
w1118 500 lux L:D vs. w- Fic30c 5000 lux L:D	11.1	13.71	-2.608	0.9235	10	9	3.993	70
w1118 500 lux L:D vs. w1118 5000 lux L:L	11.1	11.69	-0.5803	0.8988	10	10	0.9131	70
w1118 500 lux L:D vs. w- Fic30c 5000 lux L:L	11.1	3.727	7.378	0.8988	10	10	11.61	70
w- Fic30c 500 lux L:D vs. w1118 500 lux L:L	14.97	10.53	4.443	0.8988	10	10	6.99	70
w- Fic30c 500 lux L:D vs. w- Fic30c 500 lux L:L	14.97	5.753	9.22	0.8988	10	10	14.51	70
w- Fic30c 500 lux L:D vs. w1118 5000 lux L:D	14.97	12.66	2.313	0.9235	10	9	3.543	70
w- Fic30c 500 lux L:D vs. w- Fic30c 5000 lux L:D	14.97	13.71	1.261	0.9235	10	9	1.931	70
w- Fic30c 500 lux L:D vs. w1118 5000 lux L:L	14.97	11.69	3.288	0.8988	10	10	5.173	70
w- Fic30c 500 lux L:D vs. w- Fic30c 5000 lux L:L	14.97	3.727	11.25	0.8988	10	10	17.69	70
w1118 500 lux L:L vs. w- Fic30c 500 lux L:L	10.53	5.753	4.777	0.8988	10	10	7.516	70
w1118 500 lux L:L vs. w1118 5000 lux L:D	10.53	12.66	-2.129	0.9235	10	9	3.261	70
w1118 500 lux L:L vs. w- Fic30c 5000 lux L:D	10.53	13.71	-3.182	0.9235	10	9	4.873	70
w1118 500 lux L:L vs. w1118 5000 lux L:L	10.53	11.69	-1.155	0.8988	10	10	1.817	70
w1118 500 lux L:L vs. w- Fic30c 5000 lux L:L	10.53	3.727	6.804	0.8988	10	10	10.7	70
w- Fic30c 500 lux L:L vs. w1118 5000 lux L:D	5.753	12.66	-6.906	0.9235	10	9	10.58	70
w- Fic30c 500 lux L:L vs. w- Fic30c 5000 lux L:D	5.753	13.71	-7.959	0.9235	10	9	12.19	70
w- Fic30c 500 lux L:L vs. w1118 5000 lux L:L	5.753	11.69	-5.932	0.8988	10	10	9.333	70
w- Fic30c 500 lux L:L vs. w- Fic30c 5000 lux L:L	5.753	3.727	2.027	0.8988	10	10	3.189	70
w1118 5000 lux L:D vs. w- Fic30c 5000 lux L:D	12.66	13.71	-1.053	0.9475	9	9	1.571	70
w1118 5000 lux L:D vs. w1118 5000 lux L:L	12.66	11.69	0.9746	0.9235	9	10	1.493	70
w1118 5000 lux L:D vs. w- Fic30c 5000 lux L:L	12.66	3.727	8.933	0.9235	9	10	13.68	70
w- Fic30c 5000 lux L:D vs. w1118 5000 lux L:L	13.71	11.69	2.027	0.9235	9	10	3.105	70
w- Fic30c 5000 lux L:D vs. w- Fic30c 5000 lux L:L	13.71	3.727	9.986	0.9235	9	10	15.29	70
w1118 5000 lux L:L vs. w- Fic30c 5000 lux L:L	11.69	3.727	7.958	0.8988	10	10	12.52	70
