# Supplementary material for: Adaptation to constant light requires Fic-mediated AMPylation of BiP to protect against reversible photoreceptor degeneration
Source: eLife. 2018 Jul 17;7:e38752. doi: 10.7554/eLife.38752 (PMC6066327; doi:10.7554/eLife.38752)
Supplement: Figure 3—figure supplement 3—source data 3. — Quantification of ERG components with 10 days of LL. [file elife-38752-fig3-figsupp3-data3.xlsx]

## Sheet: Raw Data for S3.3 B
ON Transients Raw Values
w1118 10d LD	w1118 10d LL	w1118 rec	Fic30C 10d LD	Fic30C 10d LL	Fic30C rec
0.866667	0.103333	0.56	0.426667	0	0.42
1.52	0.253333	1.12	0.95	0.08	0.663333
1.06667	0.18	0.733333	0.34	0.12	0.343333
0.98	0.59	0.6	1.18333	0.03	0.716667
0.74	0.396667	0.773333	0.57	0.12	0.813333
0.833333	0	0.793333	0.926667	0	0.6
0.916667	0.213333	0.81	0.72	0	0.663333
0.7	0.08	0.94	0.683333	0.143333	1.04333
OFF Transients Raw Values
w1118 10d LD	w1118 10d LL	w1118 rec	Fic30C 10d LD	Fic30C 10d LL	Fic30C rec
5.64	2.42	5.8	5.96333	0	3.27
7.41667	4.95667	5.85667	6.60333	0	6.51
7.27333	4.77	6.95667	6.10667	0	4.88667
6.14333	6.91667	5.87333	5.14667	0	5.54333
5.27333	6.11333	7.13333	7.03	0.15	6.09333
6.81667	2.75667	6.41	6.39333	0	4.66
5.86	3.13667	7.19	5.65667	0	5.76667
6.11	4.54333	7.08	7.27333	0	5.61667
SNPs Raw Values
w1118 10d LD	w1118 10d LL	w1118 rec	Fic30C 10d LD	Fic30C 10d LL	Fic30C rec
9.74667	11.7867	10.58	13.44	3.29933	10.2533
13.1633	14.3233	10.2867	13.5667	4.73333	10.8133
11.3667	15.6667	11.2633	14.8533	4.35	11.8767
10.4867	12.8367	10.4133	13.02	3.90667	12.7067
8.27667	13.3967	12.48	12.1967	3.03333	10.65
12.8733	12.7167	10.2833	11.1267	4.7	10.56
14.16	9.35	12.6433	10.49	6.02667	11.94
11.7933	13.4967	9.62	12.7067	4.66	9.92

## Sheet: 1-Way ANOVA ON
Number of families	1
Number of comparisons per family	15
Alpha	0.05
Tukey's multiple comparisons test	Mean Diff.	95.00% CI of diff.	Significant?	Summary	Adjusted P Value
w1118 10d LD vs. w1118 10d LL	0.7258	0.4109 to 1.041	Yes	****	<0.0001	A-B
w1118 10d LD vs. w1118 rec	0.1617	-0.1533 to 0.4766	No	ns	0.6459	A-C
w1118 10d LD vs. Fic30C 10d LD	0.2279	-0.08701 to 0.5428	No	ns	0.2776	A-D
w1118 10d LD vs. Fic30C 10d LL	0.8913	0.5763 to 1.206	Yes	****	<0.0001	A-E
w1118 10d LD vs. Fic30C rec	0.295	-0.01993 to 0.6099	No	ns	0.0778	A-F
w1118 10d LL vs. w1118 rec	-0.5642	-0.8791 to -0.2492	Yes	****	<0.0001	B-C
w1118 10d LL vs. Fic30C 10d LD	-0.4979	-0.8128 to -0.183	Yes	***	0.0004	B-D
w1118 10d LL vs. Fic30C 10d LL	0.1654	-0.1495 to 0.4803	No	ns	0.6234	B-E
w1118 10d LL vs. Fic30C rec	-0.4308	-0.7458 to -0.1159	Yes	**	0.0025	B-F
w1118 rec vs. Fic30C 10d LD	0.06625	-0.2487 to 0.3812	No	ns	0.9883	C-D
w1118 rec vs. Fic30C 10d LL	0.7296	0.4147 to 1.045	Yes	****	<0.0001	C-E
w1118 rec vs. Fic30C rec	0.1333	-0.1816 to 0.4483	No	ns	0.8025	C-F
Fic30C 10d LD vs. Fic30C 10d LL	0.6633	0.3484 to 0.9783	Yes	****	<0.0001	D-E
Fic30C 10d LD vs. Fic30C rec	0.06708	-0.2478 to 0.382	No	ns	0.9876	D-F
Fic30C 10d LL vs. Fic30C rec	-0.5962	-0.9112 to -0.2813	Yes	****	<0.0001	E-F
Test details	Mean 1	Mean 2	Mean Diff.	SE of diff.	n1	n2	q	DF
w1118 10d LD vs. w1118 10d LL	0.9529	0.2271	0.7258	0.1055	8	8	9.73	42
w1118 10d LD vs. w1118 rec	0.9529	0.7912	0.1617	0.1055	8	8	2.167	42
w1118 10d LD vs. Fic30C 10d LD	0.9529	0.725	0.2279	0.1055	8	8	3.055	42
w1118 10d LD vs. Fic30C 10d LL	0.9529	0.06167	0.8913	0.1055	8	8	11.95	42
w1118 10d LD vs. Fic30C rec	0.9529	0.6579	0.295	0.1055	8	8	3.955	42
w1118 10d LL vs. w1118 rec	0.2271	0.7912	-0.5642	0.1055	8	8	7.563	42
w1118 10d LL vs. Fic30C 10d LD	0.2271	0.725	-0.4979	0.1055	8	8	6.675	42
w1118 10d LL vs. Fic30C 10d LL	0.2271	0.06167	0.1654	0.1055	8	8	2.217	42
w1118 10d LL vs. Fic30C rec	0.2271	0.6579	-0.4308	0.1055	8	8	5.776	42
w1118 rec vs. Fic30C 10d LD	0.7912	0.725	0.06625	0.1055	8	8	0.8881	42
w1118 rec vs. Fic30C 10d LL	0.7912	0.06167	0.7296	0.1055	8	8	9.78	42
w1118 rec vs. Fic30C rec	0.7912	0.6579	0.1333	0.1055	8	8	1.787	42
Fic30C 10d LD vs. Fic30C 10d LL	0.725	0.06167	0.6633	0.1055	8	8	8.892	42
Fic30C 10d LD vs. Fic30C rec	0.725	0.6579	0.06708	0.1055	8	8	0.8993	42
Fic30C 10d LL vs. Fic30C rec	0.06167	0.6579	-0.5962	0.1055	8	8	7.993	42

## Sheet: 1-Way ANOVA OFF
Number of families	1
Number of comparisons per family	15
Alpha	0.05
Tukey's multiple comparisons test	Mean Diff.	95.00% CI of diff.	Significant?	Summary	Adjusted P Value
w1118 10d LD vs. w1118 10d LL	1.865	0.4925 to 3.237	Yes	**	0.0027	A-B
w1118 10d LD vs. w1118 rec	-0.2208	-1.593 to 1.152	No	ns	0.9966	A-C
w1118 10d LD vs. Fic30C 10d LD	0.045	-1.327 to 1.417	No	ns	>0.9999	A-D
w1118 10d LD vs. Fic30C 10d LL	6.298	4.925 to 7.67	Yes	****	<0.0001	A-E
w1118 10d LD vs. Fic30C rec	1.023	-0.3492 to 2.396	No	ns	0.2479	A-F
w1118 10d LL vs. w1118 rec	-2.086	-3.458 to -0.7133	Yes	***	0.0006	B-C
w1118 10d LL vs. Fic30C 10d LD	-1.82	-3.192 to -0.4475	Yes	**	0.0036	B-D
w1118 10d LL vs. Fic30C 10d LL	4.433	3.06 to 5.805	Yes	****	<0.0001	B-E
w1118 10d LL vs. Fic30C rec	-0.8417	-2.214 to 0.5308	No	ns	0.4579	B-F
w1118 rec vs. Fic30C 10d LD	0.2658	-1.107 to 1.638	No	ns	0.992	C-D
w1118 rec vs. Fic30C 10d LL	6.519	5.146 to 7.891	Yes	****	<0.0001	C-E
w1118 rec vs. Fic30C rec	1.244	-0.1283 to 2.617	No	ns	0.0952	C-F
Fic30C 10d LD vs. Fic30C 10d LL	6.253	4.88 to 7.625	Yes	****	<0.0001	D-E
Fic30C 10d LD vs. Fic30C rec	0.9783	-0.3942 to 2.351	No	ns	0.2932	D-F
Fic30C 10d LL vs. Fic30C rec	-5.275	-6.647 to -3.902	Yes	****	<0.0001	E-F
Test details	Mean 1	Mean 2	Mean Diff.	SE of diff.	n1	n2	q	DF
w1118 10d LD vs. w1118 10d LL	6.317	4.452	1.865	0.4598	8	8	5.737	42
w1118 10d LD vs. w1118 rec	6.317	6.538	-0.2208	0.4598	8	8	0.6793	42
w1118 10d LD vs. Fic30C 10d LD	6.317	6.272	0.045	0.4598	8	8	0.1384	42
w1118 10d LD vs. Fic30C 10d LL	6.317	0.01875	6.298	0.4598	8	8	19.37	42
w1118 10d LD vs. Fic30C rec	6.317	5.293	1.023	0.4598	8	8	3.148	42
w1118 10d LL vs. w1118 rec	4.452	6.538	-2.086	0.4598	8	8	6.416	42
w1118 10d LL vs. Fic30C 10d LD	4.452	6.272	-1.82	0.4598	8	8	5.598	42
w1118 10d LL vs. Fic30C 10d LL	4.452	0.01875	4.433	0.4598	8	8	13.64	42
w1118 10d LL vs. Fic30C rec	4.452	5.293	-0.8417	0.4598	8	8	2.589	42
w1118 rec vs. Fic30C 10d LD	6.538	6.272	0.2658	0.4598	8	8	0.8177	42
w1118 rec vs. Fic30C 10d LL	6.538	0.01875	6.519	0.4598	8	8	20.05	42
w1118 rec vs. Fic30C rec	6.538	5.293	1.244	0.4598	8	8	3.827	42
Fic30C 10d LD vs. Fic30C 10d LL	6.272	0.01875	6.253	0.4598	8	8	19.23	42
Fic30C 10d LD vs. Fic30C rec	6.272	5.293	0.9783	0.4598	8	8	3.009	42
Fic30C 10d LL vs. Fic30C rec	0.01875	5.293	-5.275	0.4598	8	8	16.22	42

## Sheet: 1-Way ANOVA SNP
Number of families	1
Number of comparisons per family	15
Alpha	0.05
Tukey's multiple comparisons test	Mean Diff.	95.00% CI of diff.	Significant?	Summary	Adjusted P Value
w1118 10d LD vs. w1118 10d LL	-1.463	-3.59 to 0.6636	No	ns	0.3306	A-B
w1118 10d LD vs. w1118 rec	0.5371	-1.59 to 2.664	No	ns	0.9736	A-C
w1118 10d LD vs. Fic30C 10d LD	-1.192	-3.319 to 0.9353	No	ns	0.5569	A-D
w1118 10d LD vs. Fic30C 10d LL	7.145	5.018 to 9.272	Yes	****	<0.0001	A-E
w1118 10d LD vs. Fic30C rec	0.3933	-1.734 to 2.52	No	ns	0.9935	A-F
w1118 10d LL vs. w1118 rec	2	-0.1265 to 4.127	No	ns	0.0759	B-C
w1118 10d LL vs. Fic30C 10d LD	0.2717	-1.855 to 2.399	No	ns	0.9989	B-D
w1118 10d LL vs. Fic30C 10d LL	8.608	6.481 to 10.73	Yes	****	<0.0001	B-E
w1118 10d LL vs. Fic30C rec	1.857	-0.2703 to 3.984	No	ns	0.1183	B-F
w1118 rec vs. Fic30C 10d LD	-1.729	-3.856 to 0.3982	No	ns	0.1706	C-D
w1118 rec vs. Fic30C 10d LL	6.608	4.481 to 8.735	Yes	****	<0.0001	C-E
w1118 rec vs. Fic30C rec	-0.1438	-2.271 to 1.983	No	ns	>0.9999	C-F
Fic30C 10d LD vs. Fic30C 10d LL	8.336	6.209 to 10.46	Yes	****	<0.0001	D-E
Fic30C 10d LD vs. Fic30C rec	1.585	-0.5419 to 3.712	No	ns	0.2484	D-F
Fic30C 10d LL vs. Fic30C rec	-6.751	-8.878 to -4.624	Yes	****	<0.0001	E-F
Test details	Mean 1	Mean 2	Mean Diff.	SE of diff.	n1	n2	q	DF
w1118 10d LD vs. w1118 10d LL	11.48	12.95	-1.463	0.7125	8	8	2.905	42
w1118 10d LD vs. w1118 rec	11.48	10.95	0.5371	0.7125	8	8	1.066	42
w1118 10d LD vs. Fic30C 10d LD	11.48	12.68	-1.192	0.7125	8	8	2.365	42
w1118 10d LD vs. Fic30C 10d LL	11.48	4.339	7.145	0.7125	8	8	14.18	42
w1118 10d LD vs. Fic30C rec	11.48	11.09	0.3933	0.7125	8	8	0.7807	42
w1118 10d LL vs. w1118 rec	12.95	10.95	2	0.7125	8	8	3.971	42
w1118 10d LL vs. Fic30C 10d LD	12.95	12.68	0.2717	0.7125	8	8	0.5392	42
w1118 10d LL vs. Fic30C 10d LL	12.95	4.339	8.608	0.7125	8	8	17.09	42
w1118 10d LL vs. Fic30C rec	12.95	11.09	1.857	0.7125	8	8	3.685	42
w1118 rec vs. Fic30C 10d LD	10.95	12.68	-1.729	0.7125	8	8	3.431	42
w1118 rec vs. Fic30C 10d LL	10.95	4.339	6.608	0.7125	8	8	13.12	42
w1118 rec vs. Fic30C rec	10.95	11.09	-0.1438	0.7125	8	8	0.2853	42
Fic30C 10d LD vs. Fic30C 10d LL	12.68	4.339	8.336	0.7125	8	8	16.55	42
Fic30C 10d LD vs. Fic30C rec	12.68	11.09	1.585	0.7125	8	8	3.146	42
Fic30C 10d LL vs. Fic30C rec	4.339	11.09	-6.751	0.7125	8	8	13.4	42
