# Supplementary material for: Adaptation to constant light requires Fic-mediated AMPylation of BiP to protect against reversible photoreceptor degeneration
Source: eLife. 2018 Jul 17;7:e38752. doi: 10.7554/eLife.38752 (PMC6066327; doi:10.7554/eLife.38752)
Supplement: Figure 3—source data 1. — Quantification of ERG components with LD, LL, and Recovery. [file elife-38752-fig3-data1.xlsx]

## Sheet: Figure 1D quantifications
ON Transients Raw Values
w1118 Control	w1118 3d Light	w1118 3d Light + 3d Recovery	w- ; fic control	w- ; fic 3d light	w- ; fic 3d Light+ 3d Recovery		BiP WT Control	BiP WT 3d Light	BiP WT 3d Light + 3d Recovery	BiP T366A Control	BiP T366A 3d Light	BiP T366A 3d Light + 3d Recovery
1.28	0	0	0.8	0.55	0.73		0.713333	1.34333	0.08	1.77	0.1	0
1.16	0.536667	0.07	0.843333	0.833333	0.44		0.923333	1.21	0	1.43333	0.03	0
1.22	0.44	0	0.756667	1.28	0.377		0.693333	0.55	0.863	1.72	0	0.803
1.26	0.02	0	0.896667	0.66	0.41		1.59333	1.05333	0.65	1.48667	0.08	0.09
1.05	0.926667	0	0.873333	1.01667	0.54		1.19	0	0.407	1.45	0	0.297
0.956667	0.416	0.49	1.1	0.77	0.76		1.25	1.77	0.357	1.37667	0.133333	0.14
0.99	0.448	0	0.78	0.41	1.13		1.06	0.0633333	0.04	1.43333	0.05	0.44
1.55	0.042	0	0.906667	0.703333	0		0.753333	1.55	0	1.77	0	0.337
0.914	0.1	0.19	0.604	0.068	1.24		1.84	0.516667	0.033	1.45667	0	0.203
0.874	0.24	0.21	0.538	0.078	0.57		1.74	0	0	1.32	0	0.45
0.912	0.092	0.16	0.646	0.114	0.193		2.11667	0.676667	0.033	1.45333	0.11	0.067
1.348	0.114	0.223	0.652	0.192	0		2.12667	1.84333	0.52	2.2	0	0.67
1.0325	0.44	0.07	0.74	0.132	0.13		1.53667	2.2	0.183	1.19	0.216667	0.143
0.856	0.03	0	0.76	0.078	0.327		1.37333	1.025	0	1.79	0	0.117
0.61	0.042	0	0.853333	0.096	0.243		1.41333	0.71	0.52	1.58667	0.15	0.193
0.946667	0.06	0	1.01667	0.036	0.06		1.72	0	0.66	1.74	0	0.243
0.803333	0.136667	0.76	0.906667	0.084	0.173		1.14333	0.33	0.523333	1.48667	0.61	0.996667
1.62	0.326667	0.42	0.95	0	0.257		1.65333	0.68	0.556667	1.61667	0	0.61
0.73	0.11	0	0.77	0	0.33		1.19	0.846667	0.45	1.47333	0	0.5
1.22	0.123333	0	0.72	0.123333	0.24		1.3	1.22	0.843333	1.43	0	0.63
1.81667	0.52	0.833333	0.916667	0.17	0.017		1.17	0.636667	1.03	1.39	0	0.663333
0.75	0.0366667	0.95	0.75	0	0.296667		0.636667	0.283333	1.02667	1.44333	0	0.72
0.956667	0.18	0.906667	1.09	0	0.42		1.60667	0.97	1.3	1.76	0	1.43333
0.916667	0.3	0.83	0.81	0	0.47		1.01333	1.2	0.803333	1.72667	0.25	0.8
OFF Transients Raw Values
w1118 Control	w1118 3d Light	w1118 3d Light + 3d Recovery	w- ; fic control	w- ; fic 3d light	w- ; fic 3d Light+ 3d Recovery		BiP WT Control	BiP WT 3d Light	BiP WT 3d Light + 3d Recovery	BiP T366A Control	BiP T366A 3d Light	BiP T366A 3d Light + 3d Recovery
5.85	4.21333	4.303	6.32	0.01	6.42		3.87667	3.90667	2.38	7.40333	0.02	5.787
7.083	2.56	5.19	6.24667	0	7.24		3.72333	1.35	3.827	6.15333	0.02	4.977
4.48667	4.15667	5.503	7.39333	0	6.793		3.84667	6.82667	6.787	10.5467	0	6.407
7.36667	4.93333	5.52	6.80333	0.0366667	5.16		6.66333	5.87	7.23	5.25	0	6.21
6.06333	4.51	5.593	7.27333	0.06	8.113		6.08333	6.41	7.673	6.52667	0	5.82
6.87667	6.806	5.473	6.77	0.04	6.277		6.86667	0	4.297	5.35	0.12	6.95
7.22	4.158	5.697	6.34	0	6.713		6.34333	4.38333	3.753	9.46667	0.06	5.617
7.84	4.76	6.787	6.77667	0.09	0		4.10667	2.12667	6.65	7.26	0	5.93
4.816	5.846	6.98	4.188	0.09	5.617		7.89333	4.03333	6.887	5.71	0	6.013
3.86	2.364	6.64	5.128	0.052	7.33		7.95667	1.86333	1.56	9.09333	0	3.06
5.716	1.014	5.82	4.048	0.076	3.507		8.37667	0	7.447	6.05	0	6.043
6.342	4.898	6.53	5.578	0.082	0		9.08333	2.67333	3.58	5.56333	0	5.45
3.0225	4.274	4.61	5.224	0.054	3.827		7.88	4.66667	4.63	4.43667	0.0166667	5.4
2.97333	3.57	5.42	5.70667	0.58	7.07		8.37	4.42333	5.86	6.9	0	5.73
2.93	3.346	6.54	7.18667	0.078	5.66		6.07333	4.425	6.337	6.55	0.18	6.247
5.87	4.042	5.453	5.66333	0.09	0.763		7.11	5.71667	5.74	7.54	0	6.767
7.32333	4.35333	4.46	6.91667	0.048	6.44		8.19667	0	6.39	5.99	0.63	6.897
6.93667	4.56667	6.073	5.05667	0.084	6.29		6.53	1.79333	7.1	9.88667	0	6.5
6.77667	4.02	6.307	6.35	0	5.697		6.12333	1.52667	7.54	5.2	0	3.43
7.04	5.52	5.44	5.38333	0	5.003		8.10667	5.84	7.42333	6.41	0	6.27
7.47667	4.35333	5.48	4.57	0	4.62		6.05367	5.42333	10.71	5.12667	0	7.14333
7.32333	3.68	6.19	6.02	0	4.81		6.51	1.14333	9.16333	8.95667	0	6.24667
7.11	3.59	6.85667	4.22	0	4.22		4.84	1.34	8.61667	6.83	0	7.03333
5.72333	5.88	5.36	4.83	0	4.86		6.71333	2.85667	9.39	5.70667	0	6.31667
SNPs Raw Values
w1118 Control	w1118 3d Light	w1118 3d Light + 3d Recovery	w- ; fic control	w- ; fic 3d light	w- ; fic 3d Light+ 3d Recovery		BiP WT Control	BiP WT 3d Light	BiP WT 3d Light + 3d Recovery	BiP T366A Control	BiP T366A 3d Light	BiP T366A 3d Light + 3d Recovery
9.29667	12.0133	9.033	12.6733	6.28667	13.65		9.93333	11.1333	8.793	10.5333	4.47667	14.497
9.28667	7.90333	7.447	12.97	6.67333	12.16		7.2	8.95333	10.153	11.4433	6.88667	9.753
9.20667	10.02	11.28	14.0733	9.13667	12.35		12.4	13.8067	13.873	9.04333	6.86667	11.85
9.3	10.9767	10.417	12.22	8.58333	10.65		12.0133	15.2467	12.9	8.94333	3.10333	10.45
7.48667	16.334	11.333	12.94	8.67	12.477		12.79	12.83	11.96	11.0167	6.08667	12.68
11.2733	12.07	10.7	12.33	7.90333	11.387		11.4833	14.37	12.087	5.41333	6.50667	13.167
14.0933	11.984	9.757	12.01	5.20667	9.077		13.48	12.27	14.463	8.50333	8.29	11.82
12.85	8.556	8.613	11.3833	6.22333	5.597		8.68	11.9233	16.49	10.9433	4.94	14.5567
9.684	12.5	10.42	10.978	7.18	12.347		12.97	11.83	15.2833	11.16	4.77	14.4667
12.44	8.57	10.347	13.24	5.94	12.647		15.81	8.55333	8.00333	10.72	2.07667	10.8367
11.424	10.496	7.32	6.916	6.32	11.943		12.52	6.64	17.6967	16.3433	6.16667	13.2167
12.02	10.792	6.93667	12.68	6.7	5.58667		13.15	10.3767	13.6267	11.9533	5.55333	11.9133
8.275	13.34	7.22333	12.86	7.8	9.53667		14.5067	14.2467	12.9733	13.1367	5.13667	11.59
9.08333	10.62	8.09667	14.79	9.592	12.21		13.02	11.14	15.8533	9.51333	6.46	13.8167
7.12667	9.72	8.38667	12.6067	6.194	11.3533		14.45	7.875	16.3367	12.47	4.43667	14.7433
11.8833	12.11	9.29	13.8033	4.83	5.82		9.87667	15.4467	9.41	10.62	3.83667	15.98
10.65	9.73333	7.39333	13.8	4.916	11.3467		8.62	5.31	9.48333	10.8333	4.8	15.2867
11.4567	10.9333	8.48333	15.7633	4.542	9.12		12.3967	8.82333	13.7033	8.56333	5.34	16.15
10.3	9.40333	9.08333	12.1133	6.44333	10.1133		11.9467	7.39667	17.2633	9.18	4.51667	12.8533
11.8	14.15	8.50667	14.8433	5.16667	8.93		12.7367	11.23	14.2433	11.3733	6.92	10.3733
12.05	12.97	13.8533	13.6067	4.05667	10.8267		11.0667	12.4433	14.3833	5.2	8.85667	10.7033
9.50333	10.3867	9.15333	16.88	5.88333	14.3033		11.1367	13.7733	15.3167	8.65667	4.81	12
11.4267	7.85333	12.7133	16.8667	5.68333	8.52333		10.73	11.8033	15.2667	10.4933	7.29333	13.5067
8.61	13.5033	12.1567	15.1333	6.03333	12.38		11.4433	13.3667	17.5333	11.13	5.36	12.9567

## Sheet: Kruskal-Wallis test of Fic ON
Number of families	1
Number of comparisons per family	15
Alpha	0.05
Dunn's multiple comparisons test	Mean rank diff.	Significant?	Summary	Adjusted P Value
w1118 Control vs. w1118 3d Light	75.58	Yes	****	<0.0001	A-B
w1118 Control vs. w1118 3d Light + 3d Recovery	80.04	Yes	****	<0.0001	A-C
w1118 Control vs. w- ; fic control	19.91	No	ns	>0.9999	A-D
w1118 Control vs. w- ; fic 3d light	72.1	Yes	****	<0.0001	A-E
w1118 Control vs. w- ; fic 3d Light+ 3d Recovery	60.33	Yes	****	<0.0001	A-F
w1118 3d Light vs. w1118 3d Light + 3d Recovery	4.456	No	ns	>0.9999	B-C
w1118 3d Light vs. w- ; fic control	-55.67	Yes	****	<0.0001	B-D
w1118 3d Light vs. w- ; fic 3d light	-3.482	No	ns	>0.9999	B-E
w1118 3d Light vs. w- ; fic 3d Light+ 3d Recovery	-15.25	No	ns	>0.9999	B-F
w1118 3d Light + 3d Recovery vs. w- ; fic control	-60.13	Yes	****	<0.0001	C-D
w1118 3d Light + 3d Recovery vs. w- ; fic 3d light	-7.938	No	ns	>0.9999	C-E
w1118 3d Light + 3d Recovery vs. w- ; fic 3d Light+ 3d Recovery	-19.71	No	ns	>0.9999	C-F
w- ; fic control vs. w- ; fic 3d light	52.19	Yes	***	0.0003	D-E
w- ; fic control vs. w- ; fic 3d Light+ 3d Recovery	40.42	Yes	*	0.0138	D-F
w- ; fic 3d light vs. w- ; fic 3d Light+ 3d Recovery	-11.77	No	ns	>0.9999	E-F
Test details	Mean rank 1	Mean rank 2	Mean rank diff.	n1	n2
w1118 Control vs. w1118 3d Light	124.6	49.06	75.58	24	24
w1118 Control vs. w1118 3d Light + 3d Recovery	124.6	44.6	80.04	24	24
w1118 Control vs. w- ; fic control	124.6	104.7	19.91	24	24
w1118 Control vs. w- ; fic 3d light	124.6	52.54	72.1	24	24
w1118 Control vs. w- ; fic 3d Light+ 3d Recovery	124.6	64.31	60.33	24	24
w1118 3d Light vs. w1118 3d Light + 3d Recovery	49.06	44.6	4.456	24	24
w1118 3d Light vs. w- ; fic control	49.06	104.7	-55.67	24	24
w1118 3d Light vs. w- ; fic 3d light	49.06	52.54	-3.482	24	24
w1118 3d Light vs. w- ; fic 3d Light+ 3d Recovery	49.06	64.31	-15.25	24	24
w1118 3d Light + 3d Recovery vs. w- ; fic control	44.6	104.7	-60.13	24	24
w1118 3d Light + 3d Recovery vs. w- ; fic 3d light	44.6	52.54	-7.938	24	24
w1118 3d Light + 3d Recovery vs. w- ; fic 3d Light+ 3d Recovery	44.6	64.31	-19.71	24	24
w- ; fic control vs. w- ; fic 3d light	104.7	52.54	52.19	24	24
w- ; fic control vs. w- ; fic 3d Light+ 3d Recovery	104.7	64.31	40.42	24	24
w- ; fic 3d light vs. w- ; fic 3d Light+ 3d Recovery	52.54	64.31	-11.77	24	24

## Sheet: Kruskal-Wallis test of Fic OFF
Number of families	1
Number of comparisons per family	15
Alpha	0.05
Dunn's multiple comparisons test	Mean rank diff.	Significant?	Summary	Adjusted P Value
w1118 Control vs. w1118 3d Light	46.9	Yes	**	0.0015	A-B
w1118 Control vs. w1118 3d Light + 3d Recovery	11.75	No	ns	>0.9999	A-C
w1118 Control vs. w- ; fic control	8.604	No	ns	>0.9999	A-D
w1118 Control vs. w- ; fic 3d light	87.42	Yes	****	<0.0001	A-E
w1118 Control vs. w- ; fic 3d Light+ 3d Recovery	19.58	No	ns	>0.9999	A-F
w1118 3d Light vs. w1118 3d Light + 3d Recovery	-35.15	No	ns	0.0526	B-C
w1118 3d Light vs. w- ; fic control	-38.29	Yes	*	0.022	B-D
w1118 3d Light vs. w- ; fic 3d light	40.52	Yes	*	0.0114	B-E
w1118 3d Light vs. w- ; fic 3d Light+ 3d Recovery	-27.31	No	ns	0.3493	B-F
w1118 3d Light + 3d Recovery vs. w- ; fic control	-3.146	No	ns	>0.9999	C-D
w1118 3d Light + 3d Recovery vs. w- ; fic 3d light	75.67	Yes	****	<0.0001	C-E
w1118 3d Light + 3d Recovery vs. w- ; fic 3d Light+ 3d Recovery	7.833	No	ns	>0.9999	C-F
w- ; fic control vs. w- ; fic 3d light	78.81	Yes	****	<0.0001	D-E
w- ; fic control vs. w- ; fic 3d Light+ 3d Recovery	10.98	No	ns	>0.9999	D-F
w- ; fic 3d light vs. w- ; fic 3d Light+ 3d Recovery	-67.83	Yes	****	<0.0001	E-F
Test details	Mean rank 1	Mean rank 2	Mean rank diff.	n1	n2
w1118 Control vs. w1118 3d Light	101.5	54.65	46.9	24	24
w1118 Control vs. w1118 3d Light + 3d Recovery	101.5	89.79	11.75	24	24
w1118 Control vs. w- ; fic control	101.5	92.94	8.604	24	24
w1118 Control vs. w- ; fic 3d light	101.5	14.13	87.42	24	24
w1118 Control vs. w- ; fic 3d Light+ 3d Recovery	101.5	81.96	19.58	24	24
w1118 3d Light vs. w1118 3d Light + 3d Recovery	54.65	89.79	-35.15	24	24
w1118 3d Light vs. w- ; fic control	54.65	92.94	-38.29	24	24
w1118 3d Light vs. w- ; fic 3d light	54.65	14.13	40.52	24	24
w1118 3d Light vs. w- ; fic 3d Light+ 3d Recovery	54.65	81.96	-27.31	24	24
w1118 3d Light + 3d Recovery vs. w- ; fic control	89.79	92.94	-3.146	24	24
w1118 3d Light + 3d Recovery vs. w- ; fic 3d light	89.79	14.13	75.67	24	24
w1118 3d Light + 3d Recovery vs. w- ; fic 3d Light+ 3d Recovery	89.79	81.96	7.833	24	24
w- ; fic control vs. w- ; fic 3d light	92.94	14.13	78.81	24	24
w- ; fic control vs. w- ; fic 3d Light+ 3d Recovery	92.94	81.96	10.98	24	24
w- ; fic 3d light vs. w- ; fic 3d Light+ 3d Recovery	14.13	81.96	-67.83	24	24

## Sheet: Kruskal-Wallis test of Fic SNP
Number of families	1
Number of comparisons per family	15
Alpha	0.05
Dunn's multiple comparisons test	Mean rank diff.	Significant?	Summary	Adjusted P Value
w1118 Control vs. w1118 3d Light	-10.17	No	ns	>0.9999	A-B
w1118 Control vs. w1118 3d Light + 3d Recovery	15.85	No	ns	>0.9999	A-C
w1118 Control vs. w- ; fic control	-43.35	Yes	**	0.0048	A-D
w1118 Control vs. w- ; fic 3d light	54.94	Yes	****	<0.0001	A-E
w1118 Control vs. w- ; fic 3d Light+ 3d Recovery	-4.521	No	ns	>0.9999	A-F
w1118 3d Light vs. w1118 3d Light + 3d Recovery	26.02	No	ns	0.4605	B-C
w1118 3d Light vs. w- ; fic control	-33.19	No	ns	0.0877	B-D
w1118 3d Light vs. w- ; fic 3d light	65.1	Yes	****	<0.0001	B-E
w1118 3d Light vs. w- ; fic 3d Light+ 3d Recovery	5.646	No	ns	>0.9999	B-F
w1118 3d Light + 3d Recovery vs. w- ; fic control	-59.21	Yes	****	<0.0001	C-D
w1118 3d Light + 3d Recovery vs. w- ; fic 3d light	39.08	Yes	*	0.0176	C-E
w1118 3d Light + 3d Recovery vs. w- ; fic 3d Light+ 3d Recovery	-20.38	No	ns	>0.9999	C-F
w- ; fic control vs. w- ; fic 3d light	98.29	Yes	****	<0.0001	D-E
w- ; fic control vs. w- ; fic 3d Light+ 3d Recovery	38.83	Yes	*	0.0189	D-F
w- ; fic 3d light vs. w- ; fic 3d Light+ 3d Recovery	-59.46	Yes	****	<0.0001	E-F
Test details	Mean rank 1	Mean rank 2	Mean rank diff.	n1	n2
w1118 Control vs. w1118 3d Light	74.63	84.79	-10.17	24	24
w1118 Control vs. w1118 3d Light + 3d Recovery	74.63	58.77	15.85	24	24
w1118 Control vs. w- ; fic control	74.63	118	-43.35	24	24
w1118 Control vs. w- ; fic 3d light	74.63	19.69	54.94	24	24
w1118 Control vs. w- ; fic 3d Light+ 3d Recovery	74.63	79.15	-4.521	24	24
w1118 3d Light vs. w1118 3d Light + 3d Recovery	84.79	58.77	26.02	24	24
w1118 3d Light vs. w- ; fic control	84.79	118	-33.19	24	24
w1118 3d Light vs. w- ; fic 3d light	84.79	19.69	65.1	24	24
w1118 3d Light vs. w- ; fic 3d Light+ 3d Recovery	84.79	79.15	5.646	24	24
w1118 3d Light + 3d Recovery vs. w- ; fic control	58.77	118	-59.21	24	24
w1118 3d Light + 3d Recovery vs. w- ; fic 3d light	58.77	19.69	39.08	24	24
w1118 3d Light + 3d Recovery vs. w- ; fic 3d Light+ 3d Recovery	58.77	79.15	-20.38	24	24
w- ; fic control vs. w- ; fic 3d light	118	19.69	98.29	24	24
w- ; fic control vs. w- ; fic 3d Light+ 3d Recovery	118	79.15	38.83	24	24
w- ; fic 3d light vs. w- ; fic 3d Light+ 3d Recovery	19.69	79.15	-59.46	24	24

## Sheet: Kruskal-Wallis test BiP ON
Number of families	1
Number of comparisons per family	15
Alpha	0.05
Dunn's multiple comparisons test	Mean rank diff.	Significant?	Summary	Adjusted P Value
BiP WT Control vs. BiP WT 3d Light	29.4	No	ns	0.2698	A-B
BiP WT Control vs. BiP WT 3d Light + 3d Recovery	54.85	Yes	***	0.0002	A-C
BiP WT Control vs. BiP T366A Control	-15.21	No	ns	>0.9999	A-D
BiP WT Control vs. BiP T366A 3d Light	85.71	Yes	****	<0.0001	A-E
BiP WT Control vs. BiP T366A 3d Light + 3d Recovery	54.81	Yes	****	<0.0001	A-F
BiP WT 3d Light vs. BiP WT 3d Light + 3d Recovery	25.46	No	ns	0.607	B-C
BiP WT 3d Light vs. BiP T366A Control	-44.6	Yes	**	0.0043	B-D
BiP WT 3d Light vs. BiP T366A 3d Light	56.32	Yes	****	<0.0001	B-E
BiP WT 3d Light vs. BiP T366A 3d Light + 3d Recovery	25.42	No	ns	0.5292	B-F
BiP WT 3d Light + 3d Recovery vs. BiP T366A Control	-70.06	Yes	****	<0.0001	C-D
BiP WT 3d Light + 3d Recovery vs. BiP T366A 3d Light	30.86	No	ns	0.1817	C-E
BiP WT 3d Light + 3d Recovery vs. BiP T366A 3d Light + 3d Recovery	-0.03935	No	ns	>0.9999	C-F
BiP T366A Control vs. BiP T366A 3d Light	100.9	Yes	****	<0.0001	D-E
BiP T366A Control vs. BiP T366A 3d Light + 3d Recovery	70.02	Yes	****	<0.0001	D-F
BiP T366A 3d Light vs. BiP T366A 3d Light + 3d Recovery	-30.9	No	ns	0.1455	E-F
Test details	Mean rank 1	Mean rank 2	Mean rank diff.	n1	n2
BiP WT Control vs. BiP WT 3d Light	110.3	80.94	29.4	24	24
BiP WT Control vs. BiP WT 3d Light + 3d Recovery	110.3	55.48	54.85	24	24
BiP WT Control vs. BiP T366A Control	110.3	125.5	-15.21	24	24
BiP WT Control vs. BiP T366A 3d Light	110.3	24.62	85.71	24	24
BiP WT Control vs. BiP T366A 3d Light + 3d Recovery	110.3	55.52	54.81	24	24
BiP WT 3d Light vs. BiP WT 3d Light + 3d Recovery	80.94	55.48	25.46	24	24
BiP WT 3d Light vs. BiP T366A Control	80.94	125.5	-44.6	24	24
BiP WT 3d Light vs. BiP T366A 3d Light	80.94	24.62	56.32	24	24
BiP WT 3d Light vs. BiP T366A 3d Light + 3d Recovery	80.94	55.52	25.42	24	24
BiP WT 3d Light + 3d Recovery vs. BiP T366A Control	55.48	125.5	-70.06	24	24
BiP WT 3d Light + 3d Recovery vs. BiP T366A 3d Light	55.48	24.62	30.86	24	24
BiP WT 3d Light + 3d Recovery vs. BiP T366A 3d Light + 3d Recovery	55.48	55.52	-0.03935	24	24
BiP T366A Control vs. BiP T366A 3d Light	125.5	24.62	100.9	24	24
BiP T366A Control vs. BiP T366A 3d Light + 3d Recovery	125.5	55.52	70.02	24	24
BiP T366A 3d Light vs. BiP T366A 3d Light + 3d Recovery	24.62	55.52	-30.9	24	24

## Sheet: Kruskal-Wallis test BiP OFF
Number of families	1
Number of comparisons per family	15
Alpha	0.05
Dunn's multiple comparisons test	Mean rank diff.	Significant?	Summary	Adjusted P Value
BiP WT Control vs. BiP WT 3d Light	50.98	Yes	***	0.0005	A-B
BiP WT Control vs. BiP WT 3d Light + 3d Recovery	1.38	No	ns	>0.9999	A-C
BiP WT Control vs. BiP T366A Control	-2.92	No	ns	>0.9999	A-D
BiP WT Control vs. BiP T366A 3d Light	84.96	Yes	****	<0.0001	A-E
BiP WT Control vs. BiP T366A 3d Light + 3d Recovery	11.88	No	ns	>0.9999	A-F
BiP WT 3d Light vs. BiP WT 3d Light + 3d Recovery	-49.6	Yes	***	0.0008	B-C
BiP WT 3d Light vs. BiP T366A Control	-53.9	Yes	***	0.0002	B-D
BiP WT 3d Light vs. BiP T366A 3d Light	33.98	No	ns	0.0843	B-E
BiP WT 3d Light vs. BiP T366A 3d Light + 3d Recovery	-39.1	Yes	*	0.0216	B-F
BiP WT 3d Light + 3d Recovery vs. BiP T366A Control	-4.3	No	ns	>0.9999	C-D
BiP WT 3d Light + 3d Recovery vs. BiP T366A 3d Light	83.58	Yes	****	<0.0001	C-E
BiP WT 3d Light + 3d Recovery vs. BiP T366A 3d Light + 3d Recovery	10.5	No	ns	>0.9999	C-F
BiP T366A Control vs. BiP T366A 3d Light	87.88	Yes	****	<0.0001	D-E
BiP T366A Control vs. BiP T366A 3d Light + 3d Recovery	14.8	No	ns	>0.9999	D-F
BiP T366A 3d Light vs. BiP T366A 3d Light + 3d Recovery	-73.08	Yes	****	<0.0001	E-F
Test details	Mean rank 1	Mean rank 2	Mean rank diff.	n1	n2
BiP WT Control vs. BiP WT 3d Light	99.88	48.9	50.98	24	24
BiP WT Control vs. BiP WT 3d Light + 3d Recovery	99.88	98.5	1.38	24	24
BiP WT Control vs. BiP T366A Control	99.88	102.8	-2.92	24	24
BiP WT Control vs. BiP T366A 3d Light	99.88	14.92	84.96	24	24
BiP WT Control vs. BiP T366A 3d Light + 3d Recovery	99.88	88	11.88	24	24
BiP WT 3d Light vs. BiP WT 3d Light + 3d Recovery	48.9	98.5	-49.6	24	24
BiP WT 3d Light vs. BiP T366A Control	48.9	102.8	-53.9	24	24
BiP WT 3d Light vs. BiP T366A 3d Light	48.9	14.92	33.98	24	24
BiP WT 3d Light vs. BiP T366A 3d Light + 3d Recovery	48.9	88	-39.1	24	24
BiP WT 3d Light + 3d Recovery vs. BiP T366A Control	98.5	102.8	-4.3	24	24
BiP WT 3d Light + 3d Recovery vs. BiP T366A 3d Light	98.5	14.92	83.58	24	24
BiP WT 3d Light + 3d Recovery vs. BiP T366A 3d Light + 3d Recovery	98.5	88	10.5	24	24
BiP T366A Control vs. BiP T366A 3d Light	102.8	14.92	87.88	24	24
BiP T366A Control vs. BiP T366A 3d Light + 3d Recovery	102.8	88	14.8	24	24
BiP T366A 3d Light vs. BiP T366A 3d Light + 3d Recovery	14.92	88	-73.08	24	24

## Sheet: Kruskal-Wallis test BiP SNP
Number of families	1
Number of comparisons per family	15
Alpha	0.05
Dunn's multiple comparisons test	Mean rank diff.	Significant?	Summary	Adjusted P Value
BiP WT Control vs. BiP WT 3d Light	1.74	No	ns	>0.9999	A-B
BiP WT Control vs. BiP WT 3d Light + 3d Recovery	-27.78	No	ns	0.3567	A-C
BiP WT Control vs. BiP T366A Control	20.8	No	ns	>0.9999	A-D
BiP WT Control vs. BiP T366A 3d Light	67.1	Yes	****	<0.0001	A-E
BiP WT Control vs. BiP T366A 3d Light + 3d Recovery	-15.78	No	ns	>0.9999	A-F
BiP WT 3d Light vs. BiP WT 3d Light + 3d Recovery	-29.52	No	ns	0.2444	B-C
BiP WT 3d Light vs. BiP T366A Control	19.06	No	ns	>0.9999	B-D
BiP WT 3d Light vs. BiP T366A 3d Light	65.36	Yes	****	<0.0001	B-E
BiP WT 3d Light vs. BiP T366A 3d Light + 3d Recovery	-17.52	No	ns	>0.9999	B-F
BiP WT 3d Light + 3d Recovery vs. BiP T366A Control	48.58	Yes	**	0.0012	C-D
BiP WT 3d Light + 3d Recovery vs. BiP T366A 3d Light	94.88	Yes	****	<0.0001	C-E
BiP WT 3d Light + 3d Recovery vs. BiP T366A 3d Light + 3d Recovery	12	No	ns	>0.9999	C-F
BiP T366A Control vs. BiP T366A 3d Light	46.3	Yes	**	0.0025	D-E
BiP T366A Control vs. BiP T366A 3d Light + 3d Recovery	-36.58	Yes	*	0.0437	D-F
BiP T366A 3d Light vs. BiP T366A 3d Light + 3d Recovery	-82.88	Yes	****	<0.0001	E-F
Test details	Mean rank 1	Mean rank 2	Mean rank diff.	n1	n2
BiP WT Control vs. BiP WT 3d Light	83.18	81.44	1.74	25	25
BiP WT Control vs. BiP WT 3d Light + 3d Recovery	83.18	111	-27.78	25	25
BiP WT Control vs. BiP T366A Control	83.18	62.38	20.8	25	25
BiP WT Control vs. BiP T366A 3d Light	83.18	16.08	67.1	25	25
BiP WT Control vs. BiP T366A 3d Light + 3d Recovery	83.18	98.96	-15.78	25	25
BiP WT 3d Light vs. BiP WT 3d Light + 3d Recovery	81.44	111	-29.52	25	25
BiP WT 3d Light vs. BiP T366A Control	81.44	62.38	19.06	25	25
BiP WT 3d Light vs. BiP T366A 3d Light	81.44	16.08	65.36	25	25
BiP WT 3d Light vs. BiP T366A 3d Light + 3d Recovery	81.44	98.96	-17.52	25	25
BiP WT 3d Light + 3d Recovery vs. BiP T366A Control	111	62.38	48.58	25	25
BiP WT 3d Light + 3d Recovery vs. BiP T366A 3d Light	111	16.08	94.88	25	25
BiP WT 3d Light + 3d Recovery vs. BiP T366A 3d Light + 3d Recovery	111	98.96	12	25	25
BiP T366A Control vs. BiP T366A 3d Light	62.38	16.08	46.3	25	25
BiP T366A Control vs. BiP T366A 3d Light + 3d Recovery	62.38	98.96	-36.58	25	25
BiP T366A 3d Light vs. BiP T366A 3d Light + 3d Recovery	16.08	98.96	-82.88	25	25
