# Supplementary material for: Adaptation to constant light requires Fic-mediated AMPylation of BiP to protect against reversible photoreceptor degeneration
Source: eLife. 2018 Jul 17;7:e38752. doi: 10.7554/eLife.38752 (PMC6066327; doi:10.7554/eLife.38752)
Supplement: Figure 4—source data 1. — Scoring of flies for deep pseudopupil defects. [file elife-38752-fig4-data1.xlsx]

## Sheet: Figure 4B Raw Data
Percentage of flies with pseudopupil
	Trial	w1118 LD	w1118 LL	w1118 Rec	fic30C LD	fic30C LL	fic30C Rec	BiP-/- ; BiPWT LD	BiP-/- ; BiPWT LL	BiP-/- ; BiPWT Rec	BiP-/- ; BiPT366A LD	BiP-/- ; BiPT366A LL	BiP-/- ; BiPT366A Rec
	1	0.9455	0.8966	0.961538	0.9623	0.2285	0.825	0.9048	0.55	0.818182	0.8718	0.2069	0.605263
	2	0.9783	0.9298	0.95	0.96	0.1176	0.906977	0.9545	0.7674	0.942857	0.9412	0.0482	0.881579
	3	0.961538	0.894737	0.954545	0.958333	0.0169492	0.830769	0.928571	0.8	0.935484	0.769231	0.0222222	0.777778
		w1118 LD	w1118 LL	w1118 Rec	fic30C LD	fic30C LL	fic30C Rec	BiP-/- ; BiPWT LD	BiP-/- ; BiPWT LL	BiP-/- ; BiPWT Rec	BiP-/- ; BiPT366A LD	BiP-/- ; BiPT366A LL	BiP-/- ; BiPT366A Rec
Trial 1	Psudopupil	52	26	25	51	8	33	19	11	27	34	6	23
	No psuedopupil	3	3	1	2	27	7	2	9	6	5	23	15
	Total	55	29	26	53	35	40	21	20	33	39	29	38
	Percentage with pseudo pupil	94.5455	89.6552	96.1538	96.2264	22.8571	82.5	90.4762	55	81.8182	87.1795	20.6897	60.5263
Trial 2	Psudopupil	45	53	38	72	10	39	42	33	33	80	4	67
	No psuedopupil	1	4	2	3	75	4	2	10	2	5	79	9
	Total	46	57	40	75	85	43	44	43	35	85	83	76
	Percentage with pseudo pupil	97.8261	92.9825	95	96	11.7647	90.6977	95.4545	76.7442	94.2857	94.1176	4.81928	88.1579
Trial 3	Psudopupil	50	51	42	69	1	54	39	48	29	40	1	21
	No psuedopupil	2	6	2	3	58	11	3	12	2	12	44	6
	Total	52	57	44	72	59	65	42	60	31	52	45	27
	Percentage with pseudo pupil	96.1538	89.4737	95.4545	95.8333	1.69492	83.0769	92.8571	80	93.5484	76.9231	2.22222	77.7778
