# Supplementary material for: Adaptation to constant light requires Fic-mediated AMPylation of BiP to protect against reversible photoreceptor degeneration
Source: eLife. 2018 Jul 17;7:e38752. doi: 10.7554/eLife.38752 (PMC6066327; doi:10.7554/eLife.38752)
Supplement: Figure 5—source data 1. — Quantification of integrated intensity of BiP (5B), Xbp1-GFP (5D), and Atf4-DsRed (5F). [file elife-38752-fig5-data1.xlsx]

## Sheet: Fig4 B BiP levels
Normalized Data= Normalized to WT LD
Lamina							Retina
WT LD	WT 3d LL	WT Rec	Fic LD	Fic 3d LL	Fic Rec		WT LD	WT 3d LL	WT Rec	Fic LD	Fic 3d LL	Fic Rec
0.713897	1.36562	0.707412	0.771735	5.34461	1.34734		1.05612	1.45002	0.473133	0.608104	2.89757	0.353818
1.07822	1.41068	0.25694	0.898042	6.27746	0.844839		1.04824	2.52762	0.390296	0.734406	4.39887	0.440543
1.21818	1.27111	0.620675	0.605677	2.70265	0.374055		0.838048	1.46867	0.256441	0.783591	4.09059	0.614198
0.989696	3.75911	0.816932	0.508957	1.33314	0.536627		1.0576	3.4126	1.1875	0.688448	2.3136	1.26699
1.68957	1.48544	0.827247	1.10017	2.64429	1.17307		1.75789	1.22686	1.01312	1.45544	0.813825	0.991885
1.23735	1.77019	0.236943	2.0813	8.40145	1.11913		0.989401	1.50525	0.176589	0.490537	4.06767	1.86858
0.818309	2.63021	0.573918	1.06956	7.3451	0.275448		0.897321	1.69377	0.21667	0.714614	1.80041	0.33758
0.756782	1.1212	0.185122	0.606464	1.81149	1.07733		1.23665	0.396922	0.455402	0.584006	0.961788	0.664718
Raw Data= Average Intensity from four confocal sections per fly
Replica 1	Lamina						Replica 1	Retina
WT LD	WT 3d LL	WT Rec	Fic LD	Fic 3d LL	Fic Rec		WT LD	WT 3d LL	WT Rec	Fic LD	Fic 3d LL	Fic Rec
21753	41611.5	21555.3	23515.3	162854	41054.6		68280.4	93747.1	30589.1	39315.3	187335	22875.1
32854.2	42984.4	7829.14	27364	191279	25742.8		67771	163416	25233.5	47481	284397	28482.1
37118.9	38731.6	18912.4	18455.4	82351.6	11397.7		54181.7	94952.6	16579.5	50660.9	264466	39709.3
30156.8	114543	24892.5	15508.3	40621.6	16351.4		68376	220633	76774.5	44509.7
Replica 2	Lamina						Replica 2	Retina
WT LD	WT 3d LL	WT Rec	Fic LD	Fic 3d LL	Fic Rec		WT LD	WT 3d LL	WT Rec	Fic LD	Fic 3d LL	Fic Rec
41442.1	36435.2	20290.9	26985.1	64859.8	28773.3		332159	231818	191431	275011	437163	239402
30350	43419.6	5811.79	51050.5	206073	27450.2		186951	284422	33367.1	92688.6	153775	187420
20071.7	64514.3	14077.2	26234.4	180162	7830.25		169552	320044	40940.5	135029	768600	353074
18562.5	27501.1	4540.7	14875.5	44432.7	26424.9		233670	74999.7	86049.7	110350	340193	63786.9
											181733	125601

## Sheet: Fig4 D Xbp1GFP
Normalized Data= Normalized to WT LD
Lamina												Retina
w1118 LD	w1118 1d LL	w1118 2d LL	w1118 3d LL	w1118 Rec	fic30C LD	fic30C 1d LL	fic30C 2d LL	fic30C 3d LL	fic30C Rec			w1118 LD	w1118 1d LL	w1118 2d LL	w1118 3d LL	w1118 Rec	fic30C LD	fic30C 1d LL	fic30C 2d LL	fic30C 3d LL	fic30C Rec
0.819706	1.01444	2.15511	1.44357	1.73852	0.583547	1.35431	9.50997	4.09839	1.75374			1.26593	4.76484	4.89782	2.92504	1.41557	0.820684	3.28961	16.3701	2.50574	1.75635
0.456955	1.96912	2.40917	2.2451	2.6898	0.417139	3.63767	5.25089	6.09442	1.07217			0.974933	2.12873	5.46335	1.25332	0.329898	0.849407	7.9839	12.637	6.18516	0.768303
1.50561	3.17113	0.955584	2.92769	3.3475	0.487683	2.13334	4.13752	2.24885	0.977819			0.836937	3.43033	1.62378	1.21106	0.723225	0.733532	8.83509	5.65409	3.67985	0.754105
1.21773	4.43466	0.681249	1.13882	0.978252	0.370902	1.8296	6.3969	5.53951	0.431204			0.922197	5.29054	5.01001	0.492511	1.61024	0.892325	9.02228	30.1526	1.27384	0.923986
0.902004	1.29107	0.131938	0.851037	0.178746	0.922631	1.74933	2.61114	2.28953	0.214367			1.21592	3.12001	0.219466	1.57446	1.42055	0.970499	19.9491	20.7079	1.17493	0.940423
0.95972	1.17167	0.185535	0.68605	0.13601	1.01645	1.10057	2.95049	2.73631	0.125465			0.748145	3.13916	0.232976	0.820136	1.11017	0.452134	4.82824	12.8531	0.335485	0.645082
1.2204	0.802953	1.60523	0.403614	0.106519	0.677168	0.751928	2.48532	1.59873	0.137982			1.45488	2.79176	2.2022	1.85919	1.32925	0.323736	16.9059	10.9386	0.693432	0.8984
0.917876	0.511767	0.678875	0.967029	0.11102	0.615195	0.618283		0.805557	0.196063			0.581052	2.75929	3.08478	1.34633	1.8084	0.14011	16.1362	21.5619		0.444992
Raw Data= Average Intensity from four confocal sections per fly
Replica 1	Lamina											Replica 1	Retina
w1118 LD	w1118 1d LL	w1118 2d LL	w1118 3d LL	w1118 Rec	fic30C LD	fic30C 1d LL	fic30C 2d LL	fic30C 3d LL	fic30C Rec			w1118 LD	w1118 1d LL	w1118 2d LL	w1118 3d LL	w1118 Rec	fic30C LD	fic30C 1d LL	fic30C 2d LL	fic30C 3d LL	fic30C Rec
12582.4	26203.4	55667.6	22158.8	26686.2	8957.4	34982.6	245648	62910	26919.8			62095.9	233723	240245	143478	69435.9	40255.8	161361	802976	122910	86151.6
7014.23	50863.4	62230.1	34462.2	41288.2	6403.05	93963	135633	93548.9	16457.7			47821.9	104417	267986	61477.2	16182	41664.7	391622	619864	303391	37686.4
23111	81912	24683.2	44939.8	51383.8	7485.91	55105.2	106874	34519.8	15009.5			41053	168263	79648.9	59404.5	35475.3	35980.9	433374	277342	180502	36990
18692.1	114550	17597	17480.8	15016.1	5693.32	47259.4	446474	85031.1	6618.95			45235.1	259509	245748	24158.4	78984.6	43769.9	442556	1.47903e+06	32826.8	45322.9
Replica 2	Lamina											Replica 2	Retina
w1118 LD	w1118 1d LL	w1118 2d LL	w1118 3d LL	w1118 Rec	fic30C LD	fic30C 1d LL	fic30C 2d LL	fic30C 3d LL	fic30C Rec			w1118 LD	w1118 1d LL	w1118 2d LL	w1118 3d LL	w1118 Rec	fic30C LD	fic30C 1d LL	fic30C 2d LL	fic30C 3d LL	fic30C Rec
23299.2	33349	3408.03	21982.7	4617.1	23832	45186	67447	59139.9	5537.2			313833	805287	56645.1	406374	366650	250489	5.34478e+06	303255	328782	242727
24790.1	30264.9	4792.47	17721	3513.2	26255.4	28428.2	76212.6	70680.4	3240.83			193099	810229	60131.9	211680	286538	116698	3.31742e+06	86590	303255	166498
31523.6	20740.7	41464	10425.6	2751.44	17491.6	19422.7	64197.2	41295.9	3564.14			375511	720563	568396	479864	343085	83557.4	2.82328e+06	178977	86590	231880
23709.2	13219.2	17535.7	24978.9	2867.7	15890.8	15970.6		20808	5064.42			149972	712184	796194	347494	466755	36162.9	5.5652e+06		178977	114854

## Sheet: Fig4 F ATF4 DsRed
Normalized Data= Normalized to WT LD
Lamina												Retina
w1118 LD	w1118 1d LL	w1118 2d LL	w1118 3d LL	w1118 Rec	fic30C LD	fic30C 1d LL	fic30C 2d LL	fic30C 3d LL	fic30C Rec			w1118 LD	w1118 1d LL	w1118 2d LL	w1118 3d LL	w1118 Rec	fic30C LD	fic30C 1d LL	fic30C 2d LL	fic30C 3d LL	fic30C Rec
0.45534	10.023	1.182	0.487082	2.86462	2.6241	0.485675	0.460879	14.9451	2.34481			1.00514	6.34197	0.870309	1.81821	1.1928	2.65784	5.8966	1.43587	1.97318	3.98086
3.00388	2.25031	1.95993	0.365061	0.506841	1.9018	2.90287	5.86152	15.5226	3.80804			0.830558		0.897812	2.06751	0.320721	3.57202	0.923463	1.07791	9.57011	3.88673
0.321689	5.39674	1.22739	0.532978	2.76487	3.54697	0.679649	1.99552	7.7324	2.50256			1.77012	32.5937	5.11675	1.18995	0.341349	2.10716	1.83126	1.93763	4.21161	2.59511
0.219087	5.20552	1.33437	6.43489	1.32906	6.14422	0.366334	3.32826	4.66762	1.20627			0.39418	35.9747	1.39285	0.976544	0.14692	5.23296	2.30861	0.5892	22.2109	1.68859
0.944597	2.41457	0.573918	3.47707	1.91392	0.722418	0.195498	0.641337		1.32703			0.0464988	3.03388	3.23457	0.843889	2.77063	3.64223	0.114396	0.0814948	15.5161	10.8825
1.0873	6.43557	1.72021	3.98357	0.395755	1.03435	6.42033	0.106946	10.6464	4.60868			2.86857	1.92518	0.695907	6.80471	0.369437	0.678649	1.36211	0.0391623	7.94017	8.98095
1.51144	1.29656	1.31264	3.29706	4.25537	0.467274	0.908446	0.241393	12.9035	2.12915			1.04757	2.92792	13.6743	0.198364	8.55311	7.42801	0.37721	0.484575	3.73492	1.20344
0.456662	2.21212	0.7017	2.14699	2.28399	0.63007	3.84713	1.49918	4.93178	2.46321			0.037363	0.834715	3.32241	0.107404	10.4036	1.62505	0.626805	0.269083	1.56901	0.871016
Raw Data= Average Intensity from four confocal sections per fly
Replica 1	Lamina											Replica 1	Retina
w1118 LD	w1118 1d LL	w1118 2d LL	w1118 3d LL	w1118 Rec	fic30C LD	fic30C 1d LL	fic30C 2d LL	fic30C 3d LL	fic30C Rec			w1118 LD	w1118 1d LL	w1118 2d LL	w1118 3d LL	w1118 Rec	fic30C LD	fic30C 1d LL	fic30C 2d LL	fic30C 3d LL	fic30C Rec
556495	1.22496e+07	1.44459e+06	595290	3.50101e+06	3.20706e+06	593569	563265	1.82652e+07	2.86572e+06			1.79502e+06	1.13258e+07	1.55424e+06	3.24705e+06	1.55424e+06	4.7465e+06	1.05304e+07	2.56424e+06	3.5238e+06	7.1092e+06
3.67121e+06	2.75022e+06	2.39533e+06	446160	619438	2.3243e+06	3.54775e+06	7.16368e+06	1.8971e+07	4.65401e+06			1.48325e+06		1.60336e+06	3.69225e+06	1.60336e+06	6.37909e+06	1.64916e+06	1.92498e+06	1.70908e+07	6.9411e+06
393154	6.59565e+06	1.50006e+06	651381	3.37909e+06	4.33495e+06	830636	2.43884e+06	9.45019e+06	3.05852e+06			3.16117e+06	5.82073e+07	9.13773e+06	2.12506e+06	9.13773e+06	3.76307e+06	3.27035e+06	3.46031e+06	7.52129e+06	4.63448e+06
267758	6.36195e+06	1.63081e+06	7.86443e+06	1.62432e+06	7.50918e+06	447717	4.06765e+06	5.70455e+06	1.47425e+06			703945	6.42454e+07	2.48742e+06	1.74396e+06	2.48742e+06	9.34526e+06	4.12283e+06	1.05222e+06	3.96652e+07	3.01557e+06
Replica 2	Lamina											Replica 2	Retina
w1118 LD	w1118 1d LL	w1118 2d LL	w1118 3d LL	w1118 Rec	fic30C LD	fic30C 1d LL	fic30C 2d LL	fic30C 3d LL	fic30C Rec			w1118 LD	w1118 1d LL	w1118 2d LL	w1118 3d LL	w1118 Rec	fic30C LD	fic30C 1d LL	fic30C 2d LL	fic30C 3d LL	fic30C Rec
0.944597	47361.7	11257.4	3.47707	1.91392	0.722418	3834.68	12579.8		1.32703			2197.83	143400	152886	39887.6	130957	172155	5407.1	3851.96	733390	514377
1.0873	126233	33741.7	3.98357	0.395755	1.03435	125934	2097.73	10.6464	4.60868			135587	90996.3	32893	321634	17461.9	32077.2	64381.9	1851.06	375303	424497
1.51144	25431.9	25747.4	3.29706	4.25537	0.467274	17819.1	4734.9	12.9035	2.12915			49514.8	138392	646334	9375.93	404274	351095	17829.3	22904.1	176536	56882.3
0.456662	43390.6	13763.8	2.14699	2.28399	0.63007	75461.3	29406.3	4.93178	2.46321			1766.01	39453.9	157038	5076.6	491739	76810	29626.8	12718.5	74161.5	41169.7

## Sheet: 2way ANOVA of Lamina BiP
Within each column, compare rows (simple effects within columns)
Number of families	2
Number of comparisons per family	3
Q	0.05
Two-stage linear step-up procedure of Benjamini, Krieger and Yekutieli	Mean Diff.	Discovery?	q value	Individual P Value
WT
LD vs. LL	-0.7889	No	0.3108	0.1973
LD vs. Rec	0.5346	No	0.3988	0.3798
LL vs. Rec	1.324	No	0.1057	0.0335
Fic
LD vs. LL	-3.527	Yes	<0.0001	<0.0001
LD vs. Rec	0.1118	No	0.2988	0.8537
LL vs. Rec	3.639	Yes	<0.0001	<0.0001
Test details	Mean 1	Mean 2	Mean Diff.	SE of diff.	N1	N2	t	DF
WT
LD vs. LL	1.063	1.852	-0.7889	0.6023	8	8	1.31	42
LD vs. Rec	1.063	0.5281	0.5346	0.6023	8	8	0.8877	42
LL vs. Rec	1.852	0.5281	1.324	0.6023	8	8	2.198	42
Fic
LD vs. LL	0.9552	4.483	-3.527	0.6023	8	8	5.857	42
LD vs. Rec	0.9552	0.8435	0.1118	0.6023	8	8	0.1856	42
LL vs. Rec	4.483	0.8435	3.639	0.6023	8	8	6.042	42

## Sheet: 2way ANOVA of Retina BiP
Within each column, compare rows (simple effects within columns)
Number of families	2
Number of comparisons per family	3
Q	0.05
Two-stage linear step-up procedure of Benjamini, Krieger and Yekutieli	Mean Diff.	Discovery?	q value	Individual P Value
WT
LD vs. LL	-0.5896	No	0.1426	0.2033
LD vs. Rec	0.589	No	0.1426	0.2037
LL vs. Rec	1.179	Yes	0.028	0.0134
Fic
LD vs. LL	-2.645	Yes	<0.0001	<0.0001
LD vs. Rec	0.009661	No	0.3441	0.9832
LL vs. Rec	2.655	Yes	<0.0001	<0.0001
Test details	Mean 1	Mean 2	Mean Diff.	SE of diff.	N1	N2	t	DF
WT
LD vs. LL	1.11	1.7	-0.5896	0.4562	8	8	1.292	42
LD vs. Rec	1.11	0.5211	0.589	0.4562	8	8	1.291	42
LL vs. Rec	1.7	0.5211	1.179	0.4562	8	8	2.583	42
Fic
LD vs. LL	0.7574	3.403	-2.645	0.4562	8	8	5.798	42
LD vs. Rec	0.7574	0.7477	0.009661	0.4562	8	8	0.02118	42
LL vs. Rec	3.403	0.7477	2.655	0.4562	8	8	5.82	42

## Sheet: 2way ANOVA Xbp1 Lamina
Within each column, compare rows (simple effects within columns)
Number of families	2
Number of comparisons per family	10
Q	0.05
Two-stage linear step-up procedure of Benjamini, Krieger and Yekutieli	Mean Diff.	Discovery?	q value	Individual P Value
w1118
LD vs. 1D LL	-0.7959	No	0.9697	0.2089
LD vs. 2D LL	-0.1003	No	0.9697	0.8734
LD vs. 3D LL	-0.3329	No	0.9697	0.5975
LD vs. Rec	-0.1608	No	0.9697	0.7985
1D LL vs. 2D LL	0.6955	No	0.9697	0.2715
1D LL vs. 3D LL	0.463	No	0.9697	0.4631
1D LL vs. Rec	0.6351	No	0.9697	0.315
2D LL vs. 3D LL	-0.2325	No	0.9697	0.7121
2D LL vs. Rec	-0.06046	No	0.9697	0.9235
3D LL vs. Rec	0.1721	No	0.9697	0.7847
Fic
LD vs. 1D LL	-1.011	Yes	0.0391	0.1118
LD vs. 2D LL	-4.127	Yes	<0.0001	<0.0001
LD vs. 3D LL	-2.54	Yes	<0.0001	0.0001
LD vs. Rec	0.02274	No	0.3059	0.9712
1D LL vs. 2D LL	-3.116	Yes	<0.0001	<0.0001
1D LL vs. 3D LL	-1.53	Yes	0.0078	0.0174
1D LL vs. Rec	1.033	Yes	0.0391	0.1041
2D LL vs. 3D LL	1.587	Yes	0.0078	0.0171
2D LL vs. Rec	4.15	Yes	<0.0001	<0.0001
3D LL vs. Rec	2.563	Yes	<0.0001	0.0001
Test details	Mean 1	Mean 2	Mean Diff.	SE of diff.	N1	N2	t	DF
w1118
LD vs. 1D LL	1	1.796	-0.7959	0.6274	8	8	1.268	69
LD vs. 2D LL	1	1.1	-0.1003	0.6274	8	8	0.1599	69
LD vs. 3D LL	1	1.333	-0.3329	0.6274	8	8	0.5305	69
LD vs. Rec	1	1.161	-0.1608	0.6274	8	8	0.2563	69
1D LL vs. 2D LL	1.796	1.1	0.6955	0.6274	8	8	1.108	69
1D LL vs. 3D LL	1.796	1.333	0.463	0.6274	8	8	0.7379	69
1D LL vs. Rec	1.796	1.161	0.6351	0.6274	8	8	1.012	69
2D LL vs. 3D LL	1.1	1.333	-0.2325	0.6274	8	8	0.3706	69
2D LL vs. Rec	1.1	1.161	-0.06046	0.6274	8	8	0.09636	69
3D LL vs. Rec	1.333	1.161	0.1721	0.6274	8	8	0.2742	69
Fic
LD vs. 1D LL	0.6363	1.647	-1.011	0.6274	8	8	1.611	69
LD vs. 2D LL	0.6363	4.763	-4.127	0.6495	8	7	6.354	69
LD vs. 3D LL	0.6363	3.176	-2.54	0.6274	8	8	4.048	69
LD vs. Rec	0.6363	0.6136	0.02274	0.6274	8	8	0.03624	69
1D LL vs. 2D LL	1.647	4.763	-3.116	0.6495	8	7	4.798	69
1D LL vs. 3D LL	1.647	3.176	-1.53	0.6274	8	8	2.438	69
1D LL vs. Rec	1.647	0.6136	1.033	0.6274	8	8	1.647	69
2D LL vs. 3D LL	4.763	3.176	1.587	0.6495	7	8	2.443	69
2D LL vs. Rec	4.763	0.6136	4.15	0.6495	7	8	6.389	69
3D LL vs. Rec	3.176	0.6136	2.563	0.6274	8	8	4.085	69

## Sheet: 2way ANOVA Xbp1 Retina
Within each column, compare rows (simple effects within columns)
Number of families	2
Number of comparisons per family	10
Q	0.05
Two-stage linear step-up procedure of Benjamini, Krieger and Yekutieli	Mean Diff.	Discovery?	q value	Individual P Value
w1118
LD vs. 1D LL	-2.428	No	0.6736	0.1392
LD vs. 2D LL	-1.842	No	0.6736	0.2604
LD vs. 3D LL	-0.4353	No	0.9388	0.7894
LD vs. Rec	-0.2184	No	0.9388	0.8934
1D LL vs. 2D LL	0.5863	No	0.9388	0.7191
1D LL vs. 3D LL	1.993	No	0.6736	0.2237
1D LL vs. Rec	2.21	No	0.6736	0.1778
2D LL vs. 3D LL	1.407	No	0.6811	0.3892
2D LL vs. Rec	1.623	No	0.6736	0.3208
3D LL vs. Rec	0.2168	No	0.9388	0.8941
Fic
LD vs. 1D LL	-10.22	Yes	<0.0001	<0.0001
LD vs. 2D LL	-15.71	Yes	<0.0001	<0.0001
LD vs. 3D LL	-1.417	No	0.1519	0.3858
LD vs. Rec	-0.2437	No	0.2776	0.8811
1D LL vs. 2D LL	-5.491	Yes	0.0005	0.0012
1D LL vs. 3D LL	8.804	Yes	<0.0001	<0.0001
1D LL vs. Rec	9.977	Yes	<0.0001	<0.0001
2D LL vs. 3D LL	14.29	Yes	<0.0001	<0.0001
2D LL vs. Rec	15.47	Yes	<0.0001	<0.0001
3D LL vs. Rec	1.173	No	0.1653	0.4723
Test details	Mean 1	Mean 2	Mean Diff.	SE of diff.	N1	N2	t	DF
w1118
LD vs. 1D LL	1	3.428	-2.428	1.623	8	8	1.496	70
LD vs. 2D LL	1	2.842	-1.842	1.623	8	8	1.135	70
LD vs. 3D LL	1	1.435	-0.4353	1.623	8	8	0.2681	70
LD vs. Rec	1	1.218	-0.2184	1.623	8	8	0.1345	70
1D LL vs. 2D LL	3.428	2.842	0.5863	1.623	8	8	0.3611	70
1D LL vs. 3D LL	3.428	1.435	1.993	1.623	8	8	1.228	70
1D LL vs. Rec	3.428	1.218	2.21	1.623	8	8	1.361	70
2D LL vs. 3D LL	2.842	1.435	1.407	1.623	8	8	0.8664	70
2D LL vs. Rec	2.842	1.218	1.623	1.623	8	8	1	70
3D LL vs. Rec	1.435	1.218	0.2168	1.623	8	8	0.1336	70
Fic
LD vs. 1D LL	0.6478	10.87	-10.22	1.623	8	8	6.296	70
LD vs. 2D LL	0.6478	16.36	-15.71	1.623	8	8	9.678	70
LD vs. 3D LL	0.6478	2.065	-1.417	1.623	8	8	0.8728	70
LD vs. Rec	0.6478	0.8915	-0.2437	1.623	8	8	0.1501	70
1D LL vs. 2D LL	10.87	16.36	-5.491	1.623	8	8	3.382	70
1D LL vs. 3D LL	10.87	2.065	8.804	1.623	8	8	5.423	70
1D LL vs. Rec	10.87	0.8915	9.977	1.623	8	8	6.146	70
2D LL vs. 3D LL	16.36	2.065	14.29	1.623	8	8	8.805	70
2D LL vs. Rec	16.36	0.8915	15.47	1.623	8	8	9.528	70
3D LL vs. Rec	2.065	0.8915	1.173	1.623	8	8	0.7227	70

## Sheet: 2way ANOVA dsRed Lamina
Within each column, compare rows (simple effects within columns)
Number of families	2
Number of comparisons per family	10
Q	0.05
Two-stage linear step-up procedure of Benjamini, Krieger and Yekutieli	Mean Diff.	Discovery?	q value	Individual P Value
w1118
LD vs. 1d LL	-3.404	Yes	0.0227	0.0028
LD vs. 2d LL	-0.2515	No	0.6883	0.8194
LD vs. 3d LL	-1.591	No	0.255	0.1518
LD vs. Recovery	-1.039	No	0.4164	0.347
1d LL vs. 2d LL	3.153	Yes	0.0227	0.0054
1d LL vs. 3d LL	1.814	No	0.2162	0.103
1d LL vs. Recovery	2.365	No	0.0971	0.0347
2d LL vs. 3d LL	-1.339	No	0.3172	0.2266
2d LL vs. Recovery	-0.7878	No	0.4991	0.4753
3d LL vs. Recovery	0.5513	No	0.5759	0.6171
Fic30C
LD vs. 1d LL	0.1582	No	0.5581	0.8858
LD vs. 2d LL	0.367	No	0.5581	0.7391
LD vs. 3d LL	-8.059	Yes	<0.0001	<0.0001
LD vs. Recovery	-0.4148	No	0.5581	0.7066
1d LL vs. 2d LL	0.2089	No	0.5581	0.8496
1d LL vs. 3d LL	-8.217	Yes	<0.0001	<0.0001
1d LL vs. Recovery	-0.573	No	0.5581	0.6033
2d LL vs. 3d LL	-8.426	Yes	<0.0001	<0.0001
2d LL vs. Recovery	-0.7818	No	0.5581	0.4786
3d LL vs. Recovery	7.644	Yes	<0.0001	<0.0001
Test details	Mean 1	Mean 2	Mean Diff.	SE of diff.	N1	N2	t	DF
w1118
LD vs. 1d LL	1	4.404	-3.404	1.098	8	8	3.102	69
LD vs. 2d LL	1	1.252	-0.2515	1.098	8	8	0.2292	69
LD vs. 3d LL	1	2.591	-1.591	1.098	8	8	1.449	69
LD vs. Recovery	1	2.039	-1.039	1.098	8	8	0.9469	69
1d LL vs. 2d LL	4.404	1.252	3.153	1.098	8	8	2.873	69
1d LL vs. 3d LL	4.404	2.591	1.814	1.098	8	8	1.653	69
1d LL vs. Recovery	4.404	2.039	2.365	1.098	8	8	2.155	69
2d LL vs. 3d LL	1.252	2.591	-1.339	1.098	8	8	1.22	69
2d LL vs. Recovery	1.252	2.039	-0.7878	1.098	8	8	0.7178	69
3d LL vs. Recovery	2.591	2.039	0.5513	1.098	8	8	0.5023	69
Fic30C
LD vs. 1d LL	2.134	1.976	0.1582	1.098	8	8	0.1441	69
LD vs. 2d LL	2.134	1.767	0.367	1.098	8	8	0.3344	69
LD vs. 3d LL	2.134	10.19	-8.059	1.136	8	7	7.094	69
LD vs. Recovery	2.134	2.549	-0.4148	1.098	8	8	0.378	69
1d LL vs. 2d LL	1.976	1.767	0.2089	1.098	8	8	0.1903	69
1d LL vs. 3d LL	1.976	10.19	-8.217	1.136	8	7	7.233	69
1d LL vs. Recovery	1.976	2.549	-0.573	1.098	8	8	0.5221	69
2d LL vs. 3d LL	1.767	10.19	-8.426	1.136	8	7	7.417	69
2d LL vs. Recovery	1.767	2.549	-0.7818	1.098	8	8	0.7124	69
3d LL vs. Recovery	10.19	2.549	7.644	1.136	7	8	6.729	69

## Sheet: 2way ANOVA dsRed Retina
Within each column, compare rows (simple effects within columns)
Number of families	2
Number of comparisons per family	10
Q	0.05
Two-stage linear step-up procedure of Benjamini, Krieger and Yekutieli	Mean Diff.	Discovery?	q value	Individual P Value
w1118
LD vs. 1d LL	-10.95	Yes	0.0026	0.0004
LD vs. 2d LL	-2.651	No	0.4472	0.3549
LD vs. 3d LL	-0.7508	No	0.5186	0.7927
LD vs. Recovery	-2.012	No	0.456	0.4819
1d LL vs. 2d LL	8.297	Yes	0.01	0.0063
1d LL vs. 3d LL	10.2	Yes	0.0029	0.0009
1d LL vs. Recovery	8.935	Yes	0.0072	0.0034
2d LL vs. 3d LL	1.9	No	0.456	0.5067
2d LL vs. Recovery	0.6383	No	0.5186	0.8232
3d LL vs. Recovery	-1.261	No	0.5186	0.659
Fic30C
LD vs. 1d LL	1.688	No	0.7285	0.5551
LD vs. 2d LL	2.629	No	0.5514	0.3589
LD vs. 3d LL	-4.973	No	0.2976	0.085
LD vs. Recovery	-0.8932	No	0.7923	0.7546
1d LL vs. 2d LL	0.9407	No	0.7923	0.742
1d LL vs. 3d LL	-6.661	No	0.1163	0.0222
1d LL vs. Recovery	-2.581	No	0.5514	0.3676
2d LL vs. 3d LL	-7.601	No	0.099	0.0094
2d LL vs. Recovery	-3.522	No	0.4622	0.2201
3d LL vs. Recovery	4.08	No	0.4101	0.1562
Test details	Mean 1	Mean 2	Mean Diff.	SE of diff.	N1	N2	t	DF
w1118
LD vs. 1d LL	1	11.95	-10.95	2.946	8	7	3.716	69
LD vs. 2d LL	1	3.651	-2.651	2.846	8	8	0.9314	69
LD vs. 3d LL	1	1.751	-0.7508	2.846	8	8	0.2638	69
LD vs. Recovery	1	3.012	-2.012	2.846	8	8	0.7071	69
1d LL vs. 2d LL	11.95	3.651	8.297	2.946	7	8	2.816	69
1d LL vs. 3d LL	11.95	1.751	10.2	2.946	7	8	3.461	69
1d LL vs. Recovery	11.95	3.012	8.935	2.946	7	8	3.033	69
2d LL vs. 3d LL	3.651	1.751	1.9	2.846	8	8	0.6675	69
2d LL vs. Recovery	3.651	3.012	0.6383	2.846	8	8	0.2243	69
3d LL vs. Recovery	1.751	3.012	-1.261	2.846	8	8	0.4433	69
Fic30C
LD vs. 1d LL	3.368	1.68	1.688	2.846	8	8	0.5931	69
LD vs. 2d LL	3.368	0.7394	2.629	2.846	8	8	0.9236	69
LD vs. 3d LL	3.368	8.341	-4.973	2.846	8	8	1.747	69
LD vs. Recovery	3.368	4.261	-0.8932	2.846	8	8	0.3138	69
1d LL vs. 2d LL	1.68	0.7394	0.9407	2.846	8	8	0.3305	69
1d LL vs. 3d LL	1.68	8.341	-6.661	2.846	8	8	2.34	69
1d LL vs. Recovery	1.68	4.261	-2.581	2.846	8	8	0.9069	69
2d LL vs. 3d LL	0.7394	8.341	-7.601	2.846	8	8	2.671	69
2d LL vs. Recovery	0.7394	4.261	-3.522	2.846	8	8	1.237	69
3d LL vs. Recovery	8.341	4.261	4.08	2.846	8	8	1.433	69
