# Supplementary material for: Adaptation to constant light requires Fic-mediated AMPylation of BiP to protect against reversible photoreceptor degeneration
Source: eLife journal article supplement (doi:10.7554/elife.38752), 2018-07-17
Supplement: supp [file elife_poa_e38752_Figure_2_figure_supplement_1.docx]

| **Line** | **RNAi Target Gene** | **Eye Roughness Score** | | | | | **Weighted Average** | **Number of Flies** | **P-Value (Fisher's)** |
| --- | --- | --- | --- | --- | --- | --- | --- | --- | --- |
| **0** | **1** | **2** | **3** | **4** |
| **Control** | ***None*** | 0 | 1 | 68 | 3 | 0 | 2.03 | 72 | n/a |
| BS36815 | 4EBP | 0 | 0 | 96 | 0 | 0 | 2.00 | 96 | 0.032 |
| v2935 | ATF4 | Lethal | Lethal | Lethal | Lethal | Lethal | Lethal | Lethal | Lethal |
| BS25985 | ATF4 | 0 | 0 | 51 | 98 | 0 | 2.66 | 149 | 2.20E-16 |
| BS26211 | ATF6 | 0 | 2 | 68 | 2 | 0 | 2.00 | 72 | 1.000 |
| BS64873 | CaBP1 | 0 | 3 | 42 | 0 | 0 | 1.93 | 45 | 0.137 |
| BS58172 | Calnexin | 0 | 2 | 41 | 1 | 0 | 1.98 | 44 | 0.688 |
| v7799 | eIF2a | 0 | 2 | 54 | 0 | 0 | 1.96 | 56 | 0.302 |
| v104562 | eIF2a | 0 | 0 | 48 | 0 | 0 | 2.00 | 48 | 0.388 |
| BS55657 | ergic53 | 0 | 5 | 35 | 7 | 0 | 2.04 | 47 | 0.007 |
| BS35023 | Gadd45 | 0 | 0 | 45 | 3 | 0 | 2.06 | 48 | 0.811 |
| BS34346 | GP93 | 0 | 0 | 33 | 5 | 0 | 2.13 | 38 | 0.122 |
| v39561 | Ire1 | 0 | 0 | 33 | 40 | 0 | 2.55 | 73 | 4.14E-12 |
| v39562 | Ire1 | 0 | 0 | 15 | 47 | 0 | 2.76 | 62 | 2.20E-16 |
| BS62156 | Ire1 | 0 | 0 | 0 | 57 | 2 | 3.03 | 59 | 2.20E-16 |
| BS36743 | Ire1 | 0 | 0 | 0 | 14 | 13 | 3.48 | 27 | 2.20E-16 |
| BS28039 | PDI | 0 | 0 | 20 | 2 | 0 | 2.09 | 22 | 0.685 |
| v110278 | PERK | 0 | 0 | 3 | 45 | 4 | 3.02 | 52 | 2.20E-16 |
| v16427 | PERK | 0 | 0 | 0 | 13 | 30 | 3.70 | 43 | 2.20E-16 |
| BS35162 | PERK | 0 | 0 | 28 | 43 | 0 | 2.61 | 71 | 6.84E-14 |
| BS42499 | PERK | 0 | 0 | 26 | 65 | 50 | 3.17 | 141 | 2.20E-16 |
| BS36755 | Xbp1 | Lethal | Lethal | Lethal | Lethal | Lethal | Lethal | Lethal | Lethal |
| BS25990 | Xbp1 | Lethal | Lethal | Lethal | Lethal | Lethal | Lethal | Lethal | Lethal |
