# Supplementary material for: Adaptation to constant light requires Fic-mediated AMPylation of BiP to protect against reversible photoreceptor degeneration
Source: eLife journal article supplement (doi:10.7554/elife.38752), 2018-07-17
Supplement: supp [file elife_poa_e38752_Figure_3_figure_supplement_1_source_data_1.xlsx]

## Sheet: Fig.3 S1 C  LD
Average Beam Breaks per fly per 2-minute bin - Pre and Post Light
		w1118 LD					fic LD
	Minutes	Trial 1	Trial 2	Trial 3		Minutes	Trial 1	Trial 2	Trial 3
	2	3.2	0	6.5625		2	1.375	0	6.0625
	4	2.6	2.33333	5.0625		4	1.4375	1.20833	6
	6	7.4	3.15556	5.8125		6	0.5625	1.16667	5.8125
	8	4.2	2.8	5.875		8	1.1875	0.833333	4.625
	10	1.4	2.08889	5.5		10	1.375	1.125	5.75
	12	0.933333	1.33333	6		12	0.4375	0.791667	4.9375
	14	0.933333	1.02222	5.5		14	0.75	0.75	4.625
	16	3.6	1.84444	4.5		16	0.9375	0.604167	4.5625
	18	0.533333	0.777778	3.8125		18	0.8125	0.895833	4.3125
	20	0.6	0.777778	3.375		20	0.5	0.791667	3.75
	22	1.06667	1.64444	4.1875		22	0.375	1.66667	5.375
	24	0.133333	0.866667	2.3125		24	0.375	1.14583	4.1875
	26	0.733333	0.888889	3.625		26	0.25	1.29167	3.8125
	28	0	0.933333	2.9375		28	0.5625	0.770833	3.4375
	30	0.266667	0.742857	2.75		30	0.5	0.979167	3.25
	32	1.73333	1.42222	4.6875		32	2.125	1.375	5.125
	34	1.6	1.35556	3.9375		34	1.25	1.58333	6.125
	36	2.53333	2.6	5.5		36	3.1875	3.9375	4.8125
	38	1.46667	2.06667	5.125		38	2.8125	4.04167	5.6875
	40	2.93333	2.35556	5.8125		40	4.75	5.5	5.3125
	42	4.66667	4.22222	4.1875		42	4.875	4.97917	4.5
	44	3.4	3.35556	5		44	3.9375	3.89583	4.625
	46	4.8	4.44444	3.8125		46	3.1875	3.25	3.5625
	48	3.2	4.24444	2.8125		48	3.5625	3.27083	3.1875
	50	2.26667	3.4	2.75		50	1.5	1.70833	3.1875
	52	1.66667	1.82222	3		52	2.125	1.22917	3.5
	54	1.53333	3.08889	2.875		54	1.6875	1.22917	2.9375
	56	1.46667	2.62222	3.1875		56	1.3125	1.77083	2.6875
	58	1.33333	3.13333	2.625		58	2.4375	2.08333	2.9375
	60	1.6	3	2.625		60	2	2.08333	2.9375

## Sheet: Fig.3 S1 C  LL
Average Beam Breaks per fly per 2-minute bin - Pre and Post Light
		w1118 LL					fic LL
	Minutes	Trial 1	Trial 2	Trial 3		Minutes	Trial 1	Trial 2	Trial 3
	2	4.125	0	6.5625		2	2.4375	1.60417	6.5
	4	2.375	3.52083	5.0625		4	1.625	1.58333	6.1875
	6	2.3125	2.875	5.8125		6	1.0625	1.14583	5.4375
	8	1.75	2.08333	5.875		8	0.6875	1.6875	5.125
	10	2.75	2.77083	5.5		10	1.5	1.5	4.6875
	12	1.6875	2.45833	6		12	2.6875	1.22917	4.0625
	14	1.875	1.64583	5.5		14	0.6875	0.75	3.5625
	16	3.5	2.64583	4.5		16	0.8125	1.58333	3.5
	18	1.1875	1.39583	3.8125		18	1.5625	1.6875	3.4375
	20	2.75	2.77083	3.375		20	1.1875	1.72917	3.75
	22	1.375	2.41667	4.1875		22	1	2.4375	3.3125
	24	1.125	1.91667	2.3125		24	1.6875	2.45833	3.5625
	26	2	3.02083	3.625		26	1.3125	1.89583	3.6875
	28	1.625	2.06944	2.9375		28	1.25	2.08333	2.75
	30	1.8125	1.96726	2.75		30	1.8125	1.375	3.375
	32	3.6875	3.64583	4.6875		32	2.1875	1.70833	3.25
	34	3.9375	3.91667	3.9375		34	2.125	2.54167	2.75
	36	4.5	5.5	5.5		36	2.3125	2.10417	3.125
	38	3.6875	3.89583	5.125		38	1.125	1.33333	2.625
	40	4.0625	3.77083	5.8125		40	0.5	2.625	3.9375
	42	3.25	3.5	4.1875		42	1.375	2.27083	0.875
	44	2.5625	2.64583	5		44	1.75	2.27083	1.1875
	46	2.4375	2.79167	3.8125		46	2.25	2.29167	1
	48	1.5	2.4375	2.8125		48	1.375	2.22917	0.5
	50	3.3125	3.6875	2.75		50	2.625	1.39583	0.125
	52	1.8125	4	3		52	1.3125	1.02083	0.6875
	54	1.75	2.875	2.875		54	1	1.89583	0.625
	56	3.625	3.8125	3.1875		56	1.4375	1.52083	0.8125
	58	3.875	3.58333	2.625		58	1.5	2.02083	0.75
	60	1.3125	3.5	2.625		60	1.75	1.47917	0.25

## Sheet: Fig.3 S1 C Rec
Average Beam Breaks per fly per 2-minute bin - Pre and Post Light
		w1118 recovery					fic recovery
	Minutes	Trial 1	Trial 2	Trial 3		Minutes	Trial 1	Trial 2	Trial 3
	2	1.07143	3.1875	2.333		2	2.53333	3.5	3.4375
	4	0.785714	2.0625	1.467		4	4.2	3.21429	3.125
	6	0.785714	1.9375	1		6	1.86667	2.57143	3.1875
	8	0.714286	1.875	1.267		8	3.2	3.07143	2.8125
	10	1	1	0.933		10	2.33333	4	3.375
	12	0.714286	2.1875	1.133		12	2.8	3.92857	3.5
	14	0.642857	2.3125	1.067		14	2.8	3.64286	3.3125
	16	1.5	2.0625	1.533		16	3.46667	3.71429	4.0625
	18	1.21429	2.75	2.8		18	2.46667	3.07143	4.625
	20	1	2.1875	2.067		20	3	3.21429	4.0625
	22	1.28571	2	1.8		22	2.46667	2.07143	4.625
	24	1.07143	2.8125	1.8		24	2.8	2	4.1875
	26	0.5	2.25	1.267		26	3.26667	2.5	3
	28	2.28571	2.25	1.533		28	2.6	2.92857	3.3125
	30	1	1.875	1.467		30	3.4	3.42857	2.0625
	32	1.5	1.375	2.333		32	3	2.28571	1.375
	34	1	3.125	2.467		34	4.13333	1.85714	3
	36	2	3.5	4.4		36	3.2	2.5	5.0625
	38	2.28571	3.5	5.2		38	5.73333	3.71429	5.4375
	40	3.07143	3.1875	3.333		40	3.46667	3.78571	5.8125
	42	3.42857	3.125	2.933		42	4	4.28571	4.75
	44	2.28571	3.5625	4.4		44	2.73333	3.92857	4.75
	46	1.78571	4	5.467		46	3.73333	4.64286	5
	48	2.78571	4.5625	3.667		48	3.13333	4.5	4.5
	50	1.28571	4.875	3.8		50	2.93333	4.35714	4.5625
	52	2.85714	3.8125	1.6		52	2.86667	4.42857	4.6875
	54	2.14286	3.625	1.8		54	3.53333	3.92857	4.375
	56	1.42857	3.1875	2.333		56	3.33333	3.42857	3.8125
	58	2.78571	1.8125	2		58	3.46667	3.42857	4.0625
	60	2.28571	2.25	2.667		60	3.93333	3.14286	3.8125

## Sheet: Fig.3 S1 D
	Average Change in Beam Breaks
Trial	w1118 LD	fic LD	w1118 LL	fic LL	w1118 Rec	fic Rec
1	2.02222	2.73958	2.07292	0.229167	0.9474	1.08095
2	1.36138	2.46181	1.67791	0.100694	0.573	0.75
3	1.67708	1.29167	1.67708	-0.645833	0.838	0.301389
